1 **The interaction of calcium ions with specific residues in the SARS-CoV**  
2 **fusion peptide and the regulation of viral infectivity**

3

4 Miya K. Bidon<sup>1±</sup>, George Khelashvili<sup>3±</sup>, Marco R. Straus<sup>2</sup>, Tiffany Tang<sup>1</sup>, Juliana Debrito Carten<sup>1</sup>,  
5 Harel Weinstein<sup>3\*</sup>, Gary R. Whittaker<sup>2\*</sup>, and Susan Daniel<sup>1\*</sup>

6

7 <sup>1</sup>Robert Frederick Smith School of Chemical and Biomolecular Engineering, Cornell University,  
8 Ithaca, NY, USA

9 <sup>2</sup>Department of Microbiology and Immunology, Cornell University, Ithaca, NY, USA

10 <sup>3</sup>Department of Physiology & Biophysics, Weill Cornell Medicine, New York, NY, USA

11

12 \*Corresponding authors:

13 Susan Daniel: [sd386@cornell.edu](mailto:sd386@cornell.edu)

14 Gary Whittaker: [grw7@cornell.edu](mailto:grw7@cornell.edu)

15 Harel Weinstein: [haw2002@med.cornell.edu](mailto:haw2002@med.cornell.edu)

16

17 <sup>±</sup>These authors contributed equally.

## 18 **Abstract**

19           Viral envelope fusion with the host cell membrane is dependent on a specific viral fusion  
20 peptide (FP) or loop, which becomes exposed during virus entry to drive the process of  
21 membrane fusion. In coronaviruses, the FP is a highly conserved domain that sits in the center of  
22 spike protein and in SARS-CoV, is adjacent to the S2' proteolytic cleavage site. This peptide  
23 contains a hydrophobic LLF motif, as well as several conserved negatively charged amino acids  
24 that interact with Ca<sup>2+</sup> ions to promote membrane fusion. In this work we perform a systematic  
25 mutagenesis study of the negatively charged amino acids within the SARS-CoV fusion peptide  
26 (FP1/FP2) and combine this with molecular dynamics simulations to define the membrane  
27 interactions that regulate virus infectivity. We show that the E801/D802 amino acid pair in the  
28 SARS-CoV FP is predicted to bind to one Ca<sup>2+</sup> ion to promote FP-membrane interaction, with a  
29 second Ca<sup>2+</sup> ion likely pairing residue D812 with either E821 or D825. The D812/D821 residue pair  
30 promotes membrane interaction, whereas the D821/D825 is inhibitory to membrane insertion.  
31 Taken together, our results demonstrate the dynamic nature of the coronavirus FP region that  
32 likely facilitates its interactions with and insertion into the host cell membrane.

## 33 34 **Author Summary**

35 Coronaviruses have reemerged as a highly pathogenic virus family through the rise of SARS-CoV,  
36 MERS-CoV, and more recently, SARS-CoV-2. As more transmissible variants of SARS-CoV-2 arise,  
37 it is imperative that we understand the mechanisms of CoV viral entry to enable the development  
38 of effective therapeutics. Recent reviews have suggested the repurposing of FDA-approved  
39 calcium channel blockers to treat infection by coronaviruses; however, calcium's method of

40 action on viral-host cell fusion events is unknown. We have found that increased calcium  
41 availability leads to increased viral infection across the CoV family, suggesting that calcium is  
42 involved in mediating the interaction between the viral fusion peptide and the host cell  
43 membrane. As such, we hypothesize that the highly conserved fusion peptide interacts directly  
44 with calcium and this interaction is required for viral entry and infection. Through mutagenesis  
45 studies of specific negatively charged residues in the fusion peptide, we have identified residues  
46 that impact viral infectivity. We have also compared the infectivity of wild-type and mutant CoV  
47 pseudoparticles in calcium-rich or -depleted environments using chelating drugs. Our data  
48 mirrors the residue coordination observed SARS-CoV-2, as both between SARS-CoV and SARS-  
49 CoV-2 FPs bind to two calcium ions. These results demonstrate the importance of Ca<sup>2+</sup> for CoV FP  
50 function during viral entry and opens the possibility of utilizing FDA-approved calcium-blocking  
51 drugs as a treatment for COVID-19.

52

## 53 **Introduction**

54 Coronaviruses (CoVs) are a diverse family of enveloped, positive-sense, single-stranded RNA  
55 viruses responsible for causing respiratory and enteric diseases across a wide range of species [1,  
56 2]. Three pathogenic human coronaviruses have emerged during the early 21<sup>st</sup> century: in 2002,  
57 severe acute respiratory syndrome (SARS-CoV) [3]; in 2012, Middle East respiratory syndrome  
58 (MERS-CoV) [4]; and presently, SARS-CoV-2 [5, 6]. The World Health Organization has listed  
59 coronaviruses as one of the top five emerging pathogens likely to cause major epidemics due to  
60 the minimal countermeasures that exist [7-9]. While vaccines are one strategy that has proven  
61 successful during this SARS-CoV-2 pandemic, there is an outstanding need for antiviral drugs as

62 a necessary parallel line of defense. To develop new antivirals, we need to understand the  
63 fundamental biology of the virus and its host interactions. From such knowledge we can  
64 therapeutically target well-conserved parts of the viral life cycle in order to confer the broadest  
65 protection. Viral entry is indeed a conserved function [10, 11], with the coronavirus spike (S)  
66 protein controlling virus entry through its interaction with the host cell plasma membrane.  
67 Examining the entry functions of the S protein can point to vulnerable targets that can be  
68 exploited for drug intervention.

69 The CoV S protein is composed of the S1 and S2 domains, which are responsible for  
70 facilitating receptor binding and membrane fusion, respectively [10, 12, 13]. CoVs utilize two  
71 different pathways to enter host cells: an “early” pathway, often referred to as the plasma  
72 membrane route, and a “late” pathway that follows the canonical endosomal pathway [10]. The  
73 pathway used by the virus is dependent on the host cell type, and more specifically, on the local  
74 protease environment [14]. The current thinking is that SARS-CoV, MERS-CoV and SARS-CoV-2  
75 enter host cells via the early pathway when transmembrane-bound proteases (TTSPs), such as  
76 the TMPRSS2, are present. In cell lines lacking TTSPs, the virus enters cells via the endosomal  
77 route where it interacts with lysosomal proteases (*e.g.* cathepsin L) [10, 15, 16]. This pathway  
78 flexibility arises from the requirement for protease cleavage to prime the S protein for  
79 subsequent conformational changes needed to carry out membrane fusion. Two possible  
80 cleavage sites reside within the S protein: the S1/S2 site and the S2' site [17]. The first site is  
81 located at the boundary of the S1 and S2 domains and is typically cleaved by furin during virus  
82 assembly. It is this cleavage by furin that separates the binding domain from the fusion  
83 machinery. The S2' prime site is located next to the N-terminus of the conserved fusion peptide

84 (FP) segment that is liberated upon cleavage [18]. S2' cleavage allows the S2 domain to undergo  
85 a large conformational change that positions the FP for insertion into the host cell membrane  
86 [10]. FP membrane insertion is a key step in commencing the process of merging the host cell  
87 membrane with the viral envelope, resulting in the transfer of the viral genome into the host cell.

88 Given the importance of the FP in initiating membrane fusion, it is not surprising to find  
89 significant conservation of the amino acid sequence in this region of the S protein across many  
90 CoVs [19]. Due to its high degree of conservation, the FP stands out as a potential antiviral target.  
91 Thus, work carried out by our team and others has focused on understanding the structure and  
92 function of the FP. This work has identified conserved residues that interact with calcium ions  
93 ( $\text{Ca}^{2+}$ ) and mediate the interactions between the host cell membrane and the FP that lead to viral  
94 infection [19-23].

95 In our previous studies, we showed that for both SARS-CoV and MERS-CoV, calcium depletion  
96 in cell culture leads to a significant drop in viral infection [19, 20]. We connected this decrease in  
97 infectivity to a defect in membrane fusion, observing that syncytia formation during cell-to-cell  
98 fusion between S- and ACE2 receptor-expressing VeroE6 cells also drops in calcium-depleted  
99 media. We then sought to connect this observed impact on membrane fusion with the molecular  
100 scale features of S that may interact directly with calcium ions. Within the S2 domain of S, the  
101 FP sequence contains highly conserved charged amino acids that flank the hydrophobic residues  
102 LLF, which interact with the host membrane upon FP insertion [19]. We posited that these  
103 charged residues function as sites for calcium ion binding that may stabilize the local structure of  
104 the FP and position it for optimal membrane insertion. Through a series of biophysical and  
105 biochemical techniques, our group confirmed that calcium interacts directly with the FP and that

106 this interaction can be linked to infectivity. Using isothermal calorimetry, we determined the  
107 stoichiometry of the interaction between the FP and calcium ions to be two calcium ions for SARS-  
108 CoV [19, 22] and one calcium ion for MERS-CoV [20]. From circular dichroism (CD) measurements,  
109 we observed that in the presence of calcium and membranes, the FP adopts a conformation with  
110 a higher degree of alpha helicity. From electron spin resonance spectroscopy (ESR) results we  
111 found lipid ordering increased upon FP insertion, which can create favorable conditions for  
112 membrane fusion; we also observed greater lipid ordering in the presence of  $\text{Ca}^{2+}$  [19, 24]. Recent  
113 findings show that calcium is necessary to promote viral entry across multiple coronaviruses,  
114 including SARS-CoV, MERS-CoV, and SARS-CoV-2 [22, 23]. Taken together, these results revealed  
115 that the FP requires calcium to adopt the proper structure needed for membrane insertion.  
116 Despite this initial model for the interaction of calcium with the negatively charged residues of  
117 the SARS-CoV FP [19], the field still lacks a detailed structural understanding of how  $\text{Ca}^{2+}$  ions  
118 stabilize the FP for membrane insertion.

119 Here, we present specific mechanistic insight gathered from mutagenesis studies and  
120 computational simulations of the SARS-CoV FP and calcium. This work predicts the preferred  
121 modes of calcium binding to the acidic residues of the SARS-CoV FP and how those modes likely  
122 regulate membrane interactions and subsequent infectivity. We first examined the effects of  
123 mutating individual and multiple charged residues in the SARS-CoV FP on cell fusion and viral  
124 infectivity in the presence or absence of calcium. This was done to identify FP charged residues  
125 that likely interact with calcium during viral entry. We then used corresponding molecular  
126 dynamics simulations of the system to interpret our mutagenesis results structurally. From these  
127 simulations we identified the structures and probabilities of the FP's modes of calcium binding in

128 1:1 and 2:1 stoichiometries, and predicted the structure of the SARS-CoV FP that is best suited  
129 for membrane penetration.

130

## 131 **Results**

### 132 **Generation and characterization of the SARS-CoV wild-type and mutated fusion peptides**

133 Various structural conformations of the SARS-CoV spike monomer have been solved using Cryo-  
134 EM [26]. From these structures, it is apparent that the fusion peptide contains an N-terminal  
135 alpha helix, with the hydrophobic LLF residues, and a C-terminal disordered loop known to  
136 participate in cysteine-mediated intramolecular disulfide bonding (**Fig 1A**). To begin to identify  
137 the SARS-CoV FP's modes of calcium binding, we performed charged-to-alanine substitutions of  
138 six highly conserved residues within the FP sequence (**Fig 1B**). We first made single amino acid  
139 (aa) substitutions (E801A, D802A, D812A, E821A, D825A, D830A) in the wild-type SARS-CoV FP,  
140 which was used as a control. The majority of the negatively charged residues that we mutated  
141 are highly conserved across SARS-CoV, MERS-CoV, and SARS-CoV-2 (**Fig 1C**).

142 The wild-type and mutant forms of the SARS-CoV S protein were then cloned into  
143 standard pcDNA3.1 expression vectors to facilitate their transient expression in HEK293T cells.  
144 Following confirmation of high transfection efficiency in our cells, S protein synthesis, trafficking  
145 to the cells' surface, and proteolytic cleavage were all assessed. To assay proteolytic cleavage of  
146 the WT and mutant S proteins, TPCK-trypsin was added to the cells' surface 24 hours after  
147 transfection and the S proteins were then isolated by cell-surface biotinylation. Biotinylated  
148 proteins were retrieved following cell lysis using streptavidin beads, resolved by gel  
149 electrophoresis and immunoblotted using a SARS-CoV S polyclonal antibody. The resulting

150 immunoblots displayed full length, uncleaved ( $S_0$ ), and cleaved S2 subunit ( $S_2$ ) SARS-CoV S species  
151 migrating at 180kDa and 80kDa, respectively (**Fig 2A**). SARS-CoV S mutants containing the single  
152 mutations D802A, D812A, E821A, D825A, and D830A have comparable steady-state levels of full-  
153 length protein in comparison to the wild-type protein, indicating that these mutations in the FP  
154 did not impair the synthesis or trafficking of S (**Fig 2A**). Additionally, proteolytic cleavage of the  
155 D802A, D812A, E821A, D825A, and D830A mutants occurred following treatment with TPCK-  
156 trypsin, indicating that these mutants were able to be primed for downstream fusion events. We  
157 observed a higher molecular weight species running above the full-length S protein (**Fig 2**, (Higher  
158 order S)). We have determined that heating samples at 95°C with 5mM DTT for 10 minutes  
159 resolves this higher molecular weight band (data not shown), indicating that this species likely  
160 results from spike-based protein-protein interactions.

161 We were unable to detect steady-state levels of the E801A mutant on the spike  
162 immunoblots. To further probe the nature of this residue's importance, we substituted in the  
163 larger, nonpolar methionine (E801M), the polar and uncharged glutamine (E801Q), positively  
164 charged lysine (E801K) or negatively charged aspartic acid (E801D). None of these mutations,  
165 including the charge mimetic E801D, restored the steady-state levels of the S protein to that of  
166 wild-type, indicating the specific requirement of glutamic acid in this region of the FP (**Fig 2B**).

167

### 168 **Analysis of the SARS-CoV FP single point mutations' effect on syncytia formation**

169 To functionally test the ability of S protein mutants to induce cell-cell fusion, we  
170 performed a syncytia assay. To do this we transiently expressed the WT and mutated S proteins  
171 in VeroE6 cells, which are kidney epithelial cells that express the ACE2 receptor [26]. 24 hours



172 following transfection, we induced cell-cell fusion by treating the cells with trypsin to cleave the  
173 FP at the S2' site (R797). Syncytia formation was visualized by immunofluorescence using the  
174 fluorescently labeled SARS-CoV S antibody and DAPI stain to identify multinucleated S-expressing  
175 cells that had fused. Syncytia were quantified by counting every group of fused cells that had a  
176 minimum of 4 nuclei. As expected, VeroE6 cells expressing the WT S protein readily formed  
177 syncytia (**Fig 3A and B**). Conversely, cells expressing the D802A, D812A, E821A, D825A, and  
178 D830A mutants all exhibited very few syncytia, indicating a defect in cell-cell fusion (**Fig 3A and**  
179 **B; Fig S1**).

180

### 181 **Analysis of the SARS-CoV FP mutants' effect on viral infectivity**

182 SARS-CoV is designated a Risk Group 3 Select Agent that requires a specialized biosafety level  
183 3 (BSL-3) setting for experiments. Pseudoparticles can be used as safe surrogates of live SARS-  
184 CoV to enable experimentation in BSL-2 level conditions [27]. To generate SARS-CoV  
185 pseudoparticles in HEK293T cells, we used a three-plasmid co-transfection system, with plasmids  
186 encoding: (1) the full length CoV surface S protein, (2) the murine leukemia virus (MLV) core  
187 proteins *gag* and *pol*, or (3) a firefly luciferase reporter gene containing the MLV-MJ RNA  
188 packaging signal and flanked by long terminal repeat (LTR) sequences [27]. Upon successful  
189 particle fusion with a host cell membrane, the luciferase reporter RNA transcript is reverse  
190 transcribed, integrated into the cell genome and expressed, enabling a measurable readout of  
191 pseudoparticle entry. Our previous studies have shown that this approach works well for  
192 assessing the infectivity of MERS-CoV S [20], SARS-CoV S [19, 27], and SARS-CoV-2 S [28].

193 Incorporation of the WT and mutant S proteins into the SARS-CoV pseudoparticles was  
194 assessed using immunoblot analysis. Pseudoparticles with WT or the mutant S proteins D802A,  
195 D812A, E821A, D825A, and D830A show comparable levels of S protein incorporation (**Fig 4A**).  
196 As expected, we did not detect the E801A mutant in the SARS-CoV pseudoparticles, likely due to  
197 its low cellular expression or synthesis.

198 After confirming the incorporation of the wild-type and mutant spike proteins into the  
199 SARS-CoV pseudoparticles, we tested the infectivity of the pseudoparticles. As we have  
200 demonstrated previously, exposure of VeroE6 cells to WT SARS CoV pseudoparticles results in a  
201 robust luminescent signal 72 hours post infection, indicating successful viral entry (**Fig 4B**).  
202 E821A- and D825A-containing pseudoparticles did not exhibit a significant change in infectivity  
203 compared to wild-type particles, suggesting these individual residues do not have a major effect  
204 on FP function when calcium is present (**Fig 4B**). In contrast, the D802A, D812A, and D830A  
205 mutant pseudoparticles all showed a pronounced decrease in infectivity, with the D812A and  
206 D830A mutations resulting in essentially noninfectious particles. These results indicate that  
207 mutations in these three highly conserved negatively charged residues in the S protein's FP  
208 significantly decrease SARS-CoV pseudoparticle infectivity in calcium-containing conditions.

209 We next tested the effect of depleting extracellular calcium on the pseudoparticles' ability to  
210 infect VeroE6 cells using the chelator ethylene glycol-bis ( $\beta$ -aminoethyl ether)-*N,N,N',N'*-  
211 tetraacetic acid (EGTA). We have previously studied the effects of calcium on viral infectivity and  
212 adopted similar calcium depletion methods in this study [19, 20]. Briefly, we treated VeroE6 cells  
213 with 50  $\mu$ M EGTA prior to and during infection. Following incubation with the chelating agent,  
214 VeroE6 cells were inoculated with WT or mutant S protein-containing pseudoparticles and

215 incubated for 72 hours. Cells were then lysed and luminescence was quantified as a measure of  
216 pseudoparticle infectivity (**Fig 4B**). In support of our previous work [19], depletion of extracellular  
217 calcium had a marked effect on WT pseudoparticle infectivity, decreasing it to approximately half  
218 that of cells infected with WT pseudoparticles in the absence of EGTA (**Fig 4B**). Cells exposed to  
219 pseudoparticles containing either D802A or the D825A mutations also exhibited a further drop  
220 in infectivity, with the D825A mutation having the greatest additional reduction in infectivity (**Fig**  
221 **4B**). The depletion of extracellular calcium had an additive effect on the decrease in infectivity in  
222 the context of specific FP mutations (D802A, D825A). These results suggest that these negatively  
223 charged residues in the FP are affected either directly or indirectly by loss of extracellular calcium.

224 We then examined the effect of intracellular calcium depletion on pseudoparticle infectivity  
225 by using the cell-permeable calcium chelator 1,2-bis(2-aminophenoxy)ethane- *N,N,N',N'*-  
226 tetraacetic acid tetrakis (BAPTA-AM). We have previously optimized the concentrations of  
227 BAPTA-AM so as not to significantly impact cell viability [19, 20]. VeroE6 cells were treated with  
228 50  $\mu$ M BAPTA-AM briefly prior to and during pseudoparticle infection, then harvested and  
229 assayed for luminescence (**Fig 4C**). Interestingly, depletion of intracellular calcium rendered the  
230 WT pseudoparticles noninfectious; similar results were observed across the WT and all mutant  
231 pseudoparticles tested; none of the pseudoparticles were infectious. In general, these data  
232 suggest that depletion of intracellular calcium exerts a more severe effect on pseudoparticle  
233 infectivity and point to the endosomal pathway as the primary route of pseudoparticle entry.

234 From our infectivity data we deduced that the FP likely uses multiple negatively charged  
235 residues to bind to multiple calcium ions. This is supported by the further decrease in infectivity  
236 of Spike E802A- and D825A-containing pseudoparticles when extracellular calcium is depleted.

237 We hypothesize that mutating those residues individually does not lead to a complete loss in  
238 pseudoparticle infectivity, since other charged residues in the FP can compensate by binding  
239 calcium; however, removal of calcium from the medium mimics the loss of those additional  
240 residues, leading to the FP's inability to bind calcium and a loss in infectivity.

241

### 242 **Multiple negatively charged residues mediate SARS-CoV fusion peptide's calcium binding**

243 To test the hypothesis that the FP utilizes alternative residues to mediate calcium binding,  
244 we created pairwise and triple residue substitutions within the S protein's FP. The FP contains  
245 two defined regions: the N-terminal region starting just upstream from the S2' cleavage site  
246 (aa798-819), termed FP1, and the downstream region that includes a critical disulfide bond  
247 (aa820-837), termed FP2 [18, 29]. Lai *et al.* has reported a stoichiometry of two calcium ions per  
248 single SARS-CoV FP, therefore we predict that FP1 and FP2 regions each contain residues that can  
249 coordinate calcium binding [19]. In FP1, the alanine substitutions of residues D802, and D812  
250 rendered their pseudoparticles non-infectious; in FP2, the D825A and D830A substitution also  
251 led to non-infectious pseudoparticles. To investigate if individual substitutions of these three  
252 residues changed the mode of calcium binding, we created a complete set of their double  
253 mutants (E821A/D825A, E821A/D830A, D825A/D830A), and a triple mutant  
254 (E821A/D825A/D830A) (**Fig 5A**).

255 We first confirmed that these mutants were synthesized, trafficked to the plasma  
256 membrane, and were able to be cleaved by trypsin, as we had done with the single mutants (**Fig**  
257 **5B**). We also tested the functionality of these S mutants using the previously described syncytia  
258 assay. VeroE6 cells transiently expressing either a double mutant (E821A/D825A, E821A/D830A,

259 D825A/D830A) or the triple mutant (E821A/D825A/D830A) all displayed fewer syncytia  
260 compared to WT S-expressing cells (**Fig 5C and D**).

261 We then generated pseudoparticles containing the double and triple mutants and  
262 assayed the incorporation of the various mutants into the particles by immunoblotting for the  
263 spike protein. The double mutant E821/D830A- and D825A/D830A-containing pseudoparticles  
264 incorporated roughly equal amounts the S protein, while the triple mutant pseudoparticles  
265 (E821A/D825A/D830A) showed slightly reduced protein levels (**Fig 5E**). The E821A/D825A mutant  
266 particles exhibited significantly decreased protein levels indicating that although this mutant  
267 could be expressed and trafficked to the plasma membrane, its incorporation into  
268 pseudoparticles was diminished. We acknowledge the general low protein levels of the double  
269 and triple S mutants in our pseudoparticles as being a potential confounding variable.  
270 Nevertheless, we infected VeroE6 cells with the WT and mutant S protein pseudoparticles to  
271 investigate if multiple mutations in negatively charged residues of the FP caused a more  
272 pronounced decrease in infectivity. As was previously demonstrated, WT pseudoparticles are  
273 able to infect VeroE6 cells, with subsequent depletion of extra- or intra-cellular calcium causing  
274 a partial and then complete loss of infectivity, respectively (**Fig 5F and G**). Infectivity was  
275 dramatically reduced for all mutants in comparison to WT pseudoparticles, irrespective of extra-  
276 and intracellular calcium depletion. (**Fig 5F and G**). These data support the hypothesis that the  
277 SARS-CoV FP contains multiple sites of calcium binding, which when mutated result in a  
278 nonfunctional spike protein irrespective of calcium levels.

279

280 **Molecular Dynamics simulations identify the modes of the SARS-CoV FP's Ca<sup>2+</sup> binding**

281 The effects that the various S mutants have on SARS CoV pseudoparticle infectivity suggests  
282 that the FP contains multiple sites of Ca<sup>2+</sup> binding that are required for viral entry. This confirmed  
283 requirement of Ca<sup>2+</sup> for FP function prompted an analysis of the predicted modes of Ca<sup>2+</sup> binding  
284 in the wild-type and mutant SARS-CoV FPs. To this end, we carried out extensive atomistic  
285 molecular dynamics (MD) simulations of all the SARS-CoV FP constructs studied here (see  
286 Methods section). To monitor the spontaneous binding of Ca<sup>2+</sup> to the FP, we collected 18  
287 independent MD trajectories of 640ns in length for each construct. Following the analysis  
288 protocols described recently for SARS-CoV-2 FP simulations [23], the various modes of  
289 interactions between the SARS-CoV FP and Ca<sup>2+</sup> ions were assessed in the trajectories by  
290 monitoring: i) the distances between the Ca<sup>2+</sup> ions in solution and the side chains of all acidic  
291 residues in the peptide; and ii) the pairwise distances between the side chains of all acidic  
292 residues. Summarized in **Fig S2** are the observed events of simultaneous association of two Ca<sup>2+</sup>  
293 ions with various pairs of FP residues in the individual trajectories of the WT and the mutant  
294 systems (see *red* and *blue* rectangles). The combined statistics for each construct (*i.e.*, the total  
295 number of binding events for different pairs of residues) are summarized in **Fig 6**.

296 These results show the modes of Ca<sup>2+</sup> coordination in the WT protein, identifying the most  
297 frequent modes involving residue pairs E821/D825 (5 out of 18); E801/D802 and E801/D830  
298 (4/18 each); and D812/E821 (2/18). Notably, a similar pattern of coordination preference was  
299 observed in our recent computational studies of Ca<sup>2+</sup> association with SARS-CoV-2 FP [23].  
300 Moreover, simultaneous binding of Ca<sup>2+</sup> ions to the SARS-CoV-2 FP residue pairs equivalent to  
301 E801/D802 and D812/E821 produced the peptide conformations prone to membrane

302 penetration. In contrast, conformations that stabilized  $\text{Ca}^{2+}$  binding to residues equivalent to the  
303 E821/D825 pair did not enable sustained bilayer insertion.

304 From these MD simulations of the SARS-CoV FP constructs, we were able to predict the  
305 phenotypes for each construct (active or inactive). The mode of  $\text{Ca}^{2+}$  ion association predicted to  
306 be inhibitory for membrane insertion (E821-D825) is shown in *red*, and the modes of  $\text{Ca}^{2+}$   
307 association predicted to facilitate membrane insertion are depicted in *green* boxes (**Fig 6**). In  
308 those constructs with single mutations that were predicted to not have fusion activity (i.e.,  
309 E801A, D802A, D812A, and D830A) we showed that only the  $\text{Ca}^{2+}$ -coordination mode involving  
310 the E821/D825 pair persists, but not the D812/E821 pair of residues (**Fig 6**). Conversely, in the  
311 SARS-CoV FP single mutants that maintained WT-like fusion activity (E821A and D825A), we did  
312 not observe the E821/D825 residues predicted to participate in calcium binding. In these  
313 function-preserving mutants we identified additional modes of  $\text{Ca}^{2+}$  binding that are enhanced in  
314 comparison to the WT system: E801/D802 in mutant E821A, or E801/D830 in mutant D825A. For  
315 the SARS-CoV FP constructs with multiple mutations, our MD trajectories revealed an overall  
316 reduced  $\text{Ca}^{2+}$  binding ability (**Fig 6** and **Fig S3**), consistent with our experimental findings that (i)  
317 these constructs are severely defective in the cell-cell fusion (**Fig 5C and D**) and infectivity assays,  
318 and (ii) their function does not depend on the levels of either extracellular or intracellular  $\text{Ca}^{2+}$   
319 (**Fig 5F and G**).

320

321 **SARS-CoV FP propensity for membrane insertion is regulated by modes of  $\text{Ca}^{2+}$  binding.**

322 Overall, the above computational results reveal that the  $\text{Ca}^{2+}$  binding patterns of SARS-  
323 CoV FP are very similar to those of SARS-CoV-2 FP. On this basis, membrane insertion of the SARS-

324 CoV FP could be expected to be enhanced by the modes of Ca<sup>2+</sup> binding involving the E801/D802  
325 and D812/E821 pairs of residues, and to be reduced by the ones involving the E821/D825 pair.  
326 To test this premise, we carried out MD simulations of two models of the WT SARS-CoV FP  
327 spontaneously associating with the lipid membrane (see **Methods**). In one, the peptide was  
328 interacting with 2 Ca<sup>2+</sup> ions at the E801/D802 and D812/E821 sites (Model 1), and in the second,  
329 2 Ca<sup>2+</sup> ions were bound to the E801/D802 and E821/D825 pairs (Model 2). Each structure was  
330 simulated in 36 independent replicates, each run for ~0.9-1.0μs (see **Methods**).

331 Analysis of these trajectories revealed that, indeed, Model 1 extensively penetrated the  
332 membrane, while the membrane insertion of the Model 2 was negligible. This can be seen from  
333 the plots presented in **Fig 7** comparing frequencies of membrane insertion for each SARS-CoV FP  
334 residue in the simulations of Model 1 and Model 2 structures. The membrane insertion was  
335 quantified by monitoring the z-coordinate of the C<sub>α</sub> atom of each residue in the peptide. A residue  
336 was inserted into the membrane if the z-distance between its C<sub>α</sub> atom and the second carbon  
337 atom in the tail of a POPC lipid (atom C22 in CHARMM36 notation) was <5Å. As shown in **Fig 7A**,  
338 in Model 1, the N-terminal FP1 segment of the fusion peptide shows strong propensity for bilayer  
339 insertion, while in Model 2 the insertion is minimal (**Fig 7B**).

340 The detailed analysis of the individual trajectories in the Model 1 set revealed two distinct  
341 modes of bilayer penetration for SARS-CoV FP, similar to our findings for the SARS-CoV-2 FP. Thus,  
342 the Model 1 construct penetrates the bilayer either with its N-terminal LLF motif (**Fig 7C**) or with  
343 the more centrally located hydrophobic F815-M816 segment (**Fig 7D**). Interestingly, the two  
344 insertion modes appear to alternate which Ca<sup>2+</sup> ion is neighboring the inserted portion. Thus,  
345 when the LLF is inserted, the Ca<sup>2+</sup> ion associated with the neighboring E801/D802 residues is



346 bound to the membrane while the other Ca<sup>2+</sup> binding site (D812/E821) is situated away from the  
347 membrane surface (see snapshot in **Fig 7C**). In case of the F815-M816 insertion, the position of  
348 the Ca<sup>2+</sup> binding loci with respect to the membrane is reversed – the one associated with the  
349 D812/E821 pair is membrane-bound, while the E801/D802 pair is located farther from the bilayer  
350 (snapshot in **Fig 7D**). We also note that in both cases, the remaining anionic residues in the  
351 peptide (*i.e.* the ones not engaged with the Ca<sup>2+</sup> ions) are either solvent exposed (D830) or  
352 engaged with electro-neutralizing interactions with neighboring basic residues (D825/R829, **Fig**  
353 **7C and D**). These results support a mechanistic model in which membrane penetration of the  
354 SARS-CoV FP is significant only for specific modes of Ca<sup>2+</sup> binding to the peptide, *i.e.*, to the  
355 E801/D802 and D812/E821 pairs of conserved acidic residues. Moreover, Ca<sup>2+</sup> binding at the  
356 E821/D825 pair is predicted to inhibit membrane insertion.

357

## 358 **Discussion**

359 The resurgence of pathogenic human coronaviruses brings about an immediate need for  
360 improving countermeasures to combat these global health threats. Increasing our knowledge of  
361 the mechanisms of viral entry is essential to develop broad-spectrum vaccines and antivirals. Viral  
362 entry is a critical step in the viral life cycle that is mediated by the S viral protein [8, 30, 31]. The  
363 S protein's FP is responsible for mediating viral and host cell membrane fusion. This region is  
364 highly conserved across the *Coronaviridae* viral family and understanding it how it functions may  
365 lead to the development of more broad-acting therapeutics. Previous work has highlighted the  
366 role that cations play in viral fusion, specifically Ca<sup>2+</sup>. The electrostatic interactions between  
367 cations and negatively charged residues in the fusion peptide promote membrane fusion, leading

368 to higher infectivity [19-22, 32]. Lai et al. has proposed that two Ca<sup>2+</sup> ions were needed to interact  
369 with SARS-CoV FP; in each of the subdomains (FP1 and FP2), one Ca<sup>2+</sup> coordinates two negatively  
370 charged residues to allow the FP to adopt a conformation that promotes membrane insertion  
371 [19].

372 To interrogate the requirement of the negatively charged residues in the SARS CoV fusion  
373 peptide for its function, we first made single charge-to alanine substitutions in those residues  
374 (**Fig 1**). Following transient expression of these mutants in Vero6 cells, we confirmed that  
375 mutants D802A, D812A, E821A, D825A, and D830A were synthesized, accumulated to levels  
376 comparable to the WT protein, and were trafficked to the plasma membrane (**Fig 2**). We further  
377 confirmed the cell surface localization of these same FP mutants by treating VeroE6 cells  
378 expressing these mutants with trypsin to assess their cleavage, after which we retrieved the FPs  
379 using a cell surface biotinylation assay (**Fig 2**). The majority of the FP mutants assayed exhibited  
380 cleavage following treatment with trypsin, indicating the accessibility of the S1/S2 cleavage site.  
381 The E801A mutant was not detected on our spike immunoblots and further attempts to  
382 understand this occurrence through additional substitutions did not result in the detection of this  
383 mutant. We hypothesize that the absence of glutamate at position 801 in the fusion peptide  
384 causes a loss in protein stability, though further work is needed to determine the significance of  
385 this residue in the fusion peptide.

386 We next tested the fusion competency of the single FP mutants we had created using a  
387 syncytia assay, which utilizes fusion events in cells transiently expressing the FP as a readout of  
388 FP fusion activity. All of the single FP charged-to-alanine mutants the were detected on the spike  
389 immunoblot (E801A, D802A, D812A, E821A, D825A, and D830A) exhibited a pronounced fusion

390 defect, as evidenced by the low number of fused VeroE6 cells, or syncytia, that were observed  
391 (**Fig 3**). Taken together, these data suggest that the highly conserved, negatively-charged  
392 residues within the FP individually contribute in a non-redundant manner to the function of the  
393 fusion peptide. However, due to the limitations and variability of the syncytia assay, we chose to  
394 use SARS-CoV2 pseudoparticles to mimic a more in vivo-like system to examine the functionality  
395 of the various FP mutants. Successful pseudoparticle entry into host cells results in the  
396 integration of the luciferase reporter gene into the cellular genome. Luminescence can therefore  
397 be used as a readout of pseudoparticle infectivity. We first confirmed the incorporation of the  
398 WT and single-charged-to-alanine mutant FPs into the pseudoparticles (**Fig 4A**). Nearly all FP  
399 mutants generated (E801A, D802A, D812A, E821A, D825A, and D830A) were incorporated in the  
400 SARS-CoV2 pseudoparticles; the E801A mutant was not detected.

401 We then infected VeroE6 cells using the SARS-CoV2 pseudoparticles we had generated  
402 and measured luminescence as a readout of infectivity and a proxy for viral entry. Introduction  
403 of WT pseudoparticles into VeroE6 cells results in a robust luminescence signal, indicating  
404 successful viral entry and fusion competency of the viral particles when calcium levels are  
405 unperturbed (**Fig 4B and C**). Infections with E821A and D825A-containing pseudoparticles at  
406 physiological levels of calcium also resulted in luminescence levels comparable to WT-containing  
407 pseudoparticles, suggesting that these residues are not required for FP function. To the contrary,  
408 pseudoparticles containing the D802A, D812A, or D830A mutations were unable to infect VeroE6  
409 cells, resulting in a significant drop in luminescence. These data indicate that when intra- and  
410 extra-cellular calcium levels remain unchanged, loss of an individual negative charges at positions

411 D802, D812, or D830 is sufficient to cause a substantial decrease in infectivity, likely due to a  
412 defect in FP-mediated viral fusion and subsequent viral entry.

413 We then proceeded to test the requirement of extracellular calcium on the infectivity of  
414 our FP-containing pseudoparticles by treating the cells with EGTA, a calcium-preferring chelator,  
415 prior to infection. Removal of extracellular calcium resulted in a significant drop in the infectivity  
416 of WT FP-containing particles, which is consistent with the known requirement of calcium for  
417 SARS CoV2 viral entry (**Fig 4B**). Interestingly, pseudoparticles containing either the D802A or  
418 D825A mutant showed a further reduction in infectivity when the extracellular calcium was  
419 depleted. This suggests that multiple negatively charged residues in the FP are involved in calcium  
420 binding and while loss of a single negative charge may not be sufficient to completely disrupt  
421 infectivity, multiple “hits” are. Thus, removal of extracellular calcium mimics the loss of additional  
422 electrostatic interactions needed for FP function, resulting in a further decrease in infectivity.  
423 Pseudoparticles containing either the D812A or D830A FP mutant were essentially non-infectious  
424 in the presence or absence of extracellular calcium. These results implicate residues D812A and  
425 D830A in FP function; however, their specific roles as they relate to calcium cannot be teased  
426 apart in this system.

427 We also depleted intracellular calcium levels using the cell permeable calcium chelator  
428 BAPTA-AM, in order to test the contribution of intracellular (endosomal) during pseudoparticle  
429 infectivity.

430

431 Following treatment with BAPTA-AM, WT FP-containing pseudoparticles are no longer  
432 infectious (**Fig 4C**), indicating that intracellular calcium, specifically in the endosome, contributes

433 to pseudoparticle entry (**Fig 4B and C**). We propose that chelation with EGTA likely removed  
434 the majority of extracellular calcium causing a 50% reduction in infectivity of WT FP-containing  
435 pseudoparticles; however, it is known that SARS-CoV enters cells via two pathways: the plasma  
436 membrane and endosomal pathways. Hence, the partial reduction in viral infectivity in the  
437 presence of EGTA and then the complete loss of infectivity in the presence of BAPTA-AM may  
438 reflect the SARS-CoV pseudoparticles' usage of these two pathways as well. It is important for  
439 us to acknowledge that we cannot rule out the potential impact that depletion of intracellular  
440 calcium may have on the integration, expression, or synthesis of the reporter transgene in the  
441 pseudoparticle. However, we performed cell viability assays to optimize the concentrations of  
442 both chelators used in this study and are confident that treatments with EGTA and BAPTA-AM  
443 did not induce toxicity in the VeroE6 cells.

444         Given that the results from our infectivity assay suggested the involvement of multiple  
445 calcium-binding residues in the fusion peptide, we then generated double mutants (E821A,  
446 E825A; E821A, D830A; E825A, D830A) and a triple mutant (E821A:E825A;D830A) of the FP (**Fig**  
447 **6A**). We validated the expression, synthesis, and cell surface localization of these mutants, as  
448 well as their ability to be cleaved by trypsin (**Fig 6B**). As with the single mutants, we observed a  
449 fusion defect in VeroE6 cells transiently expressing these mutant constructs, evidenced by the  
450 few number of syncytia formed in comparison to cells expressing the WT FP (**Fig 6D**). When then  
451 assayed the fusion activity of these mutants using the previously described pseudoparticle  
452 infectivity assay. The double mutants E821A; D830A and E825A; D830A and a triple mutant  
453 E821A; E825A; D830A were all incorporated into the pseudoparticles; the E821A; E825A mutant  
454 was not (**Fig 6C**). If the FP binds calcium using more than one negatively charged residue, then

455 pseudoparticles containing the double or triple charge-to alanine mutants should exhibit a  
456 further decrease in infectivity. In comparison to WT FP-containing pseudoparticles, the FP double  
457 mutants E821A; D830A and E825A; D830A and the triple mutant E821A;E825A;D830A we assayed  
458 showed a complete loss in infectivity. Because the FP double mutant E821A, E825A was not  
459 incorporated into the pseudoparticles, we could not fully assess the impact of these mutations  
460 on FP function; however, the low number of syncytia observed in cells expressing this mutant  
461 suggests these residues are important for FP function. In summary, these results support the  
462 hypothesis that the SARS-CoV2 fusion peptide requires multiple negatively charged residues to  
463 bind to calcium during viral entry. Specifically, our data implicate FP residues D802 and D825 in  
464 coordinating the FP's interaction with calcium.

465 To better understand how the various charged residues in the SARS-CoV FP coordinate  
466 calcium binding, we undertook molecular dynamic (MD) simulations with the FP and calcium  
467 ions. The MD simulations of the Ca<sup>2+</sup>-loaded peptide with the membrane illuminated the way  
468 Ca<sup>2+</sup> binding to FP binding may affect its function. Exploring the probability of each FP residue  
469 interacting with the membrane in the identified Ca<sup>2+</sup>-binding modes reveals the preferred mode  
470 of peptide insertion to be with the N-terminal end interacting with a calcium ion coordinated by  
471 residues E801 and D802 (**Fig 7**). The depth of insertion and the determinant role of the Ca<sup>2+</sup> ion  
472 in facilitating membrane insertion are identical to the findings for the SARS-CoV-2 peptide and  
473 are in agreement with the experimental measurements of SARS-CoV FP membrane insertion by  
474 Lai *et al* [19, 20, 22]. That Ca<sup>2+</sup> interacts with the same highly conserved, charged residues in the  
475 FPs of SARS-CoV and SARS-CoV-2 is not surprising.

476 Results from our computational modeling of SARS-CoV FP-membrane interactions in the  
477 presence of  $\text{Ca}^{2+}$  show that the propensity of the SARS-CoV FP for membrane insertion is dictated  
478 by specific modes of  $\text{Ca}^{2+}$  binding. The  $\text{Ca}^{2+}$  binding mode that enables the most sustained  
479 membrane penetration involves the initial association of the peptide with the bilayer through a  
480  $\text{Ca}^{2+}$  binding site located near the N-terminus of the peptide. This site (E801/D802) is made  
481 accessible following enzymatic cleavage and is inserted into the membrane via the insertion of  
482 the juxtaposed hydrophobic segment (the LLF motif). In this process, all anionic residues of the  
483 peptide are either engaged with  $\text{Ca}^{2+}$  ions, with neighboring basic residues, or remain solvent  
484 exposed away from the membrane. Based on the preferred modes of  $\text{Ca}^{2+}$ -loaded FP interaction  
485 with the membrane, we propose that the binding of  $\text{Ca}^{2+}$  following S protein cleavage at the S2'  
486 site creates an energetically feasible membrane insertion process (**Fig 7A**) composed of the  
487 following steps: (1) steering of the peptide towards the bilayer surface; (2) exposure of the  
488 hydrophobic layer of the membrane to the conserved N-terminal LLF motif of the FP anchored  
489 by the  $\text{Ca}^{2+}$  interactions with the phospholipid headgroups; and (3) shielding of the anionic  
490 residues of the peptide by the preferred inserting conformation of the FP to prevent their  
491 negative charge from interfering with membrane insertion. These three components became  
492 evident from the analysis of the MD simulation trajectories presented here for the SARS-CoV FP  
493 and bear a very high similarity to results from computational studies of the SARS-CoV-2 FP  
494 (PMID: 33631204).

495 Remarkably, in both the SARS-CoV-2 FP simulations [23] and here, we observed a  $\text{Ca}^{2+}$  binding  
496 mode that inhibits long-lasting membrane insertion. In this mode  $\text{Ca}^{2+}$  association with the  
497 E821/D825 pair (corresponding to the D839/D843 in SARS-CoV-2 FP) positions the LLF motif near

498 the negatively charged D812 residue at the membrane surface (**Fig 7B**). This eliminates the  
499 favorable effect of the negative charge screening by the  $\text{Ca}^{2+}$ , so that the peptide bilayer  
500 encounters are transient and do not lead to penetration by the LLF motif. This mechanistic model,  
501 which highlights the role of the positioning of D812 residue in specific  $\text{Ca}^{2+}$  binding modes, is  
502 supported by our findings for the SARS-CoV S mutants, as it was previously found to be an  
503 impactful mutation in the SARS-CoV FP [18]. A recent study from Koppiseti *et al* asserts that a  
504  $\text{Ca}^{2+}$  may be binding to D843/D849 in SARS-CoV-2 FP (corresponding to D825/D830 in SARS-CoV  
505 FP); however, as shown from the simulations in this study and Khelashvili *et al*, there is a high  
506 likelihood that second  $\text{Ca}^{2+}$  ion will bind to D812/D821 (corresponding to the D830/D839 in SARS-  
507 CoV-2 FP) for the maximal membrane penetration [23, 25]. Recent NMR studies regarding the  
508 membrane interaction with the fusion peptide still have yet to be fully resolved as current models  
509 use bicelles [25] and micelles [33], which do not completely capture the composition of the  
510 bilayer as was done for the computational modeling shown here; though the model of membrane  
511 insertion proposed by Koppiseti *et al* [25] most aligns with our proposed CoV FP interaction with  
512 bilayer (**Fig 8**). Thus, as shown in **Figs 6 and 7**, mutations that creates a high propensity for the  
513  $\text{Ca}^{2+}$  binding mode involving the E821/D825 pair, stabilize peptide conformations that are non-  
514 productive for membrane penetration and are found here to inactivate the FP (**Fig 6**).

515 Interestingly, though our computational studies did not confirm the role of D830 with  $\text{Ca}^{2+}$ ,  
516 our biological studies still reaffirmed its importance in the FP. Current studies on SARS-CoV-2 S  
517 protein classified the disordered portion of the FP in the FP2 domain as the FPPR (fusion peptide  
518 proximal region), which includes the charged residues D839/D843/D848 or E821/D825/D830  
519 equivalent in SARS-CoV FP [23, 34]. This FPPR region was determined to be important, as it binds



520 to the RBD through the CTD1, and maintains the closed pre-fusion S trimer [34]. This is due to  
521 the tight packing around the disulfide bond reinforced by a bond between K835 and D848 (K817  
522 and D830 in SARS-CoV FP). The equivalent residue in SARS-CoV FP, based on biological studies, is  
523 a critical residue [34]. Mutating D830 removes the binding partner of K817, thereby loosening  
524 the ‘knot’ of the structured FPPR in maintaining the closed form of the trimeric S protein [34].  
525 Without the reinforcements, we may lose the optimal structural conformation of the S protein  
526 upon receptor binding to expose the S2’ cleavage site to promote successful proteolytic cleavage  
527 [30].

528 More broadly, the E801 and D830 residues are conserved within the CoV family and the D812  
529 residue is conserved within betacoronaviruses [18, 19]. The implication is that calcium  
530 interactions are a conserved mechanism that serves to better position the FP for membrane  
531 insertion. Different coronaviruses exhibit different requirements for calcium; MERS-CoV binds  
532 to one Ca<sup>2+</sup> ion in its FP1 domain [20], thus, it is important to investigate the role of Ca<sup>2+</sup> and FP  
533 interactions across the CoV family. The conservation of calcium-binding residues in the FP of  
534 many coronaviruses suggests that the CoV fusion mechanisms can be potential targets for broad-  
535 spectrum antiviral drugs [35-37]. Repurposing FDA-approved calcium channel blocking (CCB)  
536 drugs to inhibit CoV entry, particularly for SARS-CoV-2, is one option worth exploring. Recent  
537 studies have shown that the CCB felodipine is a potential candidate to inhibit SARS-CoV-2 entry  
538 [35]. CCBs can target conserved viral functions, providing a rapid solution to address new and  
539 future SARS-CoV-2 variants. It will be important to identify the mechanisms of CCBs CoV  
540 inhibition, as they may directly inhibit a viral target or indirectly inhibit viral entry by affecting  
541 host cell processes

542 In this study, we elucidate the relationship between highly conserved residues in the SARS  
543 CoV FP and the critical role they have in coordinating calcium binding to facilitate viral entry.  
544 Interestingly, SARS-CoV-2 variants have arisen as part of Clade 20A that contain a D839G or  
545 D839Y mutation (E821 equivalent in SARS-CoV), with this mutation predicted to affect FP-Ca<sup>2+</sup>  
546 interactions [38-40]. To date, it is not known if there is any selective advantage to the virus  
547 conferred by this mutation or whether the emergence of these variants simply represents a  
548 founder effect.

549 Regarding to the role calcium plays during SARS-CoV entry, our data points to the necessity  
550 of intra- and extra-cellular calcium during infection. Loss of extracellular calcium results in a 50%  
551 reduction in PP infectivity, while the loss of intracellular calcium rendered pseudoparticles  
552 noninfectious. Together with the MD simulations, we propose a model of SARS-CoV viral entry  
553 mediated, in part, by calcium. In this model, upon S2' cleavage the spike protein's FP is exposed  
554 and stabilized by binding to 2 calcium ions through electrostatic interactions. We believe that the  
555 residues that likely mediate these essential interactions with calcium are E801/D802 and  
556 D812/E821. Stabilization of the FP is critical for host membrane insertion, given the unstructured  
557 and flexible FP2 loop in this peptide. We hypothesize that calcium interaction helps stabilize the  
558 FP structure prior to membrane insertion, thus in the absence of a single negatively charged  
559 residue, the FP can compensate through alternative residues to bind to calcium. Overall, more  
560 studies are needed to fully understand the role calcium plays in CoV FP function and its effects  
561 on viral pathogenesis.

562  
563 **Materials and Methods**  
564

565 **Cells, plasmids, and reagents.** Human embryonic kidney 293 (HEK293T) and African green  
566 monkey kidney epithelial (VeroE6) cells were obtained from the American Type Culture  
567 Collection (ATCC, Manassas, VA). Both cell lines were grown in complete DMEM, composed of  
568 Dulbecco's modified Eagle medium (DMEM, CellGro), supplemented with 10% HyClone  
569 FetalClone II (GE) and 10 mM HEPES (CellGro) at 37°C and 5% CO<sub>2</sub>. The plasmids used for  
570 generating pseudoparticles were the pCMV-MLV gag-pol murine leukemia virus (MLV) packaging  
571 construct, the pTG-Luc transfer vector encoding the luciferase reporter gene, and the pCAGGS-  
572 VSVG plasmids were provided by Jean Dubuisson (Lille Pasteur Institute, Lille, France) and co-  
573 transfected as previously described [27]. The plasmid encoding the C9-tagged SARS-CoV spike  
574 protein (pcDNA3.1-C9-SARS-CoV S) was provided by Dr. Michael Farzan from the New England  
575 Primate Research Center. Recombinant L-1-tosylamide-2-phenylethyl chloromethyl ketone  
576 (TPCK)-treated trypsin was obtained from Sigma. The calcium chelators EGTA and BAPTA-AM  
577 (acetoxymethyl ester) were obtained from VWR and Tocris, respectively. Both compounds were  
578 diluted in dimethyl sulfoxide (ThermoFisher) prior to use.

579

580 **Site-directed mutagenesis.** Site-directed mutagenesis was performed on the SARS-CoV spike  
581 protein vector, pcDNA3.1-SARS-CoV-S, via the QuikChange Lightning site-directed mutagenesis  
582 kit (Aligent). PCRs and transformations were performed based on the manufacturer's  
583 recommendations. Primers obtained from IDT Technologies were designed using the primer  
584 design tool from Aligent. The primers used to generate the SARS-CoV S mutants can be found in  
585 the supplementary information (**SI, Table S1**). Mutations were confirmed via Sanger Sequencing  
586 at the Cornell University Life Sciences Core Laboratories Center.

587

588 **Cell Surface Biotinylation Assay.** HEK293T cells were seeded at a density of  $8 \times 10^5$  cells per well  
589 in poly-D-lysine coated 6-well plates. 24 hours later, cells were transfected with 2ug of WT or  
590 mutant SARS-CoV S protein expressing plasmids using polyethylenimine (PEI) (Fisher). To  
591 transfect each well, 2  $\mu$ g of plasmid DNA and 6  $\mu$ L of a 1ug/ $\mu$ L solution of PEI were incubated with  
592 50  $\mu$ L of serum free OptiMEM (Gibco) for 20 minutes. 2 mL of complete DMEM were then added  
593 to this transfection mixture, which was used to replace the cell media. Cells were transfected for  
594 24 hours, washed once with 1X DPBS, and then left untreated or treated with 1mL of 0.8 nM  
595 TPCK-trypsin in DPBS for 10 minutes at 37°C. Cell surface proteins were then biotinylated on ice  
596 by incubating rinsed cells in a biotin-containing buffer (250 ug/mL in PBS) for 20 minutes. The  
597 biotin buffer was then replaced with a quenching solution (50mM glycine in DPBS) and incubated  
598 for 30 minutes on ice. Cells were then lysed for 15 minutes using a lysis buffer containing 0.1%  
599 Triton in 1x TBS with protease inhibitors (cOmplete Protease Inhibitor Cocktail). Lysates were  
600 collected and spun at 13000 rpm for 10 minutes to pellet the insoluble material. The lysates were  
601 then incubated overnight at 4° C with equilibrated streptavidin beads to retrieve the biotinylated  
602 spike proteins. The captured spike proteins were eluted by boiling the beads in 1x LDS sample  
603 buffer in the presence of DTT (NuPAGE) for 10 minutes. Proteins were resolved on 4-12% gradient  
604 Bis-Tris gels (NuPAGE) and transferred to PVDF membranes. The SARS-CoV S protein was  
605 detected using the SARS-CoV S rabbit polyclonal primary antibody (NR-4569, BEI resources) and  
606 Alexa Fluor 488-labeled goat anti-rabbit secondary antibody (Invitrogen). The resulting protein  
607 bands were visualized using a Chemidoc system with Image Lab image capture software (BioRad).  
608 Bands have only been adjusted in contrast and brightness using the Image Lab software.

609

610 **Cell-cell fusion assay.**  $3.5 \times 10^5$  VeroE6 cells were seeded in 8-well chamber slides (Millipore).

611 After 24 hours, cells were transfected with a mixture containing 0.75  $\mu$ L of Turbofect

612 (ThermoFisher), 0.5  $\mu$ g of S-expressing plasmid, and 11.75  $\mu$ L OptiMEM for each well. Following

613 18 hours of transfection, cells were washed with 1X DPBS and trypsinized with 0.8 nM TPCK-trypsin

614 for 5 minutes at 37°C to. Cells were then fixed with 4% paraformaldehyde (PFA) (ThermoFisher)

615 for 15 minutes and washed three times with DPBS. To permeabilize the cells, 0.1% Triton X-100

616 was added to each well and cells were incubated for 5 minutes on ice. After three washes with

617 DPBS, the cells were blocked with 5% normal goat serum for 30 minutes. Cells were again washed

618 and then labeled with SARS-CoV S rabbit polyclonal antibody (NR-4569, BEI resources), followed

619 by labeling with Alexa Fluor 488-labeled goat anti-rabbit secondary antibody (Invitrogen). The

620 cell nuclei were labeled with a DAPI stain present in the mounting media (DAPI Fluoromount-G,

621 Southern Biotech). Microscopy images were acquired using an upright microscope (Echo Revolve)

622 with a 10x objective. To quantify the number of nuclei per syncytia, three randomly selected

623 fields were acquired and spike-expressing cells and syncytia were manually counted. The average

624 number of nuclei per syncytium and standard deviation were calculated and visualized using

625 Microsoft Excel and GraphPad Prism 7.

626

627 **SARS CoV pseudoparticle infectivity assays.** SARS-CoV pseudoparticles were produced as

628 previously described [20, 27]. To generate pseudoparticles,  $3.5 \times 10^5$  HEK293T cells were seeded

629 in 6-well plates. Pseudoparticles were prepared by transfecting HEK293T cells with 600  $\mu$ g of their

630 respective SARS WT or mutant S plasmids, 800  $\mu$ g of pTG-Luc, and 600  $\mu$ g of pCMV-MLV gagpol

631 using polyethylenimine (PEI) as the transfection reagent. The cell supernatant was harvested 48  
632 hours post-transfection, centrifuged at 1200 rpm for 7 minutes to separate the pseudoparticles  
633 from residual cellular debris, and filtered through a 0.45  $\mu\text{m}$  syringe filter. The pseudoparticles  
634 were stored at  $-80^{\circ}\text{C}$  for one freeze-thaw cycle. To determine pseudoparticle infectivity,  $5 \times 10^5$   
635 VeroE6 cells were seeded into 24-well plates and infected 200  $\mu\text{L}$  of pseudoparticles for 72 hrs at  
636  $37^{\circ}\text{C}$ . Cells were lysed for 10 minutes at room temperature using the Luciferase cell lysis reagent  
637 (Promega). Luminescence readings were performed using a luminometer, Glomax 20/20 system  
638 (Promega). Each experiment contained three technical replicates and was repeated at least three  
639 times. Data analysis was performed using graphical software, GraphPad Prism 7.

640 For the calcium depletion studies, calcium was chelated from the extracellular or intracellular  
641 environment using EGTA or BAPTA-AM, respectively. To deplete extracellular calcium levels,  
642 VeroE6 cells were pre-treated with DMEM lacking calcium (DMEM- lacks L-glutamine, sodium  
643 pyruvate, HEPES, and calcium; it contains 2% HyClone and 10 mM HEPES) for 1 hour at  $37^{\circ}\text{C}$ . After  
644 the DMEM- pretreatment, the VeroE6 cells were infected with 200  $\mu\text{L}$  of pseudoparticles in the  
645 presence of 50  $\mu\text{M}$  EGTA for 2 hours at  $37^{\circ}\text{C}$ . Following infection, cells were supplemented with  
646 300  $\mu\text{L}$  of calcium-containing cDMEM.

647 To chelate intracellular calcium, VeroE6 cells were pretreated with 50  $\mu\text{M}$  BAPTA-AM  
648 (dissolved in DMSO) in DMEM+ (DMEM without L-glutamine, sodium pyruvate, HEPES; 2%  
649 HyClone; 10 mM HEPES; Gibco) in the same conditions as described above. Cells were then  
650 infected with 200  $\mu\text{L}$  of pseudoparticles in the presence of 50  $\mu\text{M}$  BAPTA-AM for 2 hours and  
651 supplemented with cDMEM post-infection. Because BAPTA-AM was dissolved in DMSO, VeroE6  
652 cells were pretreated with the equivalent percentage of DMSO used in the BAPTA-AM treated

653 cells. This served as an important control for the effects of DMSO alone on our infectivity assay.  
654 Pseudoparticles infections carried out in calcium-containing DMEM+ served as a positive control  
655 for infection in absence of the extracellular chelator. Analysis of pseudoparticle infectivity under  
656 these calcium depletion conditions was performed as described above.

657 To confirm the presence of the S protein in the pseudoparticles, 1.5 mL of the harvested  
658 pseudoparticles were spun down using an ultracentrifuge in a TLA-55 rotor (Beckman-Coulter) at  
659  $42,000 \times g$  for 2 hours at 4°C. The supernatant was aspirated and the S protein-containing pellet  
660 was resuspended and boiled in 1x LDS sample buffer in the presence of DTT for 10 minutes. The  
661 samples were resolved and immunoblotted for the spike protein as described above.

662

663 **Modeling of the SARS-CoV fusion peptide.** The structural cartoon model of the SARS-CoV S  
664 protein fusion peptide is based on the SARS-CoV S prefusion structure from the Protein Data  
665 Bank, PDB 5XLR. The sequence of the SARS-CoV S protein (GenBank accession no. AAT74874.1)  
666 was aligned to the PDB 5XLR SARS-CoV structure sequence using Geneious software (**v.2020.1.1**).  
667 Structural models of the SARS-CoV S monomer were generated using the Modeller comparative  
668 modeling tool (**v.9.23**) within the Chimera software (v.1.13; University of California). Images were  
669 created using Adobe Illustrator CC (**v.24.03**).

670

671 **Molecular dynamics (MD) simulations of the SARS-CoV FP in water.** For all the atomistic MD  
672 simulations, the SARS-CoV FP segment was capped with neutral N- and C-termini (ACE and CT3,  
673 respectively, in the CHARMM force-field nomenclature). Protonation states of all the titratable  
674 residues were predicted at pH 7 using Propka 3.1 software [42].

675 For the simulations in water, one copy of the peptide (wild-type or a mutant) was embedded  
676 in a rectangular solution box and ionized using VMD tools (“Add Solvation Box” and “Add Ions”,  
677 respectively) [43]. The box of dimensions  $\sim 90 \text{ \AA} \times 80 \text{ \AA} \times 82 \text{ \AA}$  included a  $\text{Na}^+\text{Cl}^-$  ionic solution as  
678 well as 2  $\text{Ca}^{2+}$  ions, and  $\sim 18000$  water molecules. The total number of atoms in the system was  
679  $\sim 54,540$ .

680 The system was equilibrated with NAMD version 2.13 [44] following a multi-step protocol  
681 during which the backbone atoms of the SARS-CoV FP as well as  $\text{Ca}^{2+}$  ions in the solution were  
682 first harmonically constrained and subsequently gradually released in four steps (totaling  $\sim 3\text{ns}$ ),  
683 changing the restrain force constants  $k_F$  from 1, to 0.5, to 0.1 kcal/ (mol  $\text{\AA}^2$ ), and 0 kcal/ (mol  $\text{\AA}^2$ ).  
684 These simulations implemented all option for rigidbonds, 1fs (for  $k_F$  1, 0.5, and 0.1 kcal/ (mol  $\text{\AA}^2$ ))  
685 or 2fs (for  $k_F$  of 0) integration time-step, PME for electrostatics interactions [45], and were carried  
686 out in NPT ensemble under isotropic pressure coupling conditions, at a temperature of 310 K.  
687 The Nose-Hoover Langevin piston algorithm [46] was used to control the target  $P = 1 \text{ atm}$   
688 pressure with the “LangevinPistonPeriod” set to 200 fs and “LangevinPistonDecay” set to 50 fs.  
689 The van der Waals interactions were calculated applying a cutoff distance of 12  $\text{\AA}$  and switching  
690 the potential from 10  $\text{\AA}$ .

691 After this initial equilibration phase, the velocities of all atoms in the system were reset and  
692 ensemble MD runs were initiated with OpenMM version 7.4 [47] during which the system was  
693 simulated in 18 independent replicates, each for 640ns (i.e., cumulative time of  $\sim 11.5 \mu\text{s}$  for each  
694 FP construct). These runs implemented PME for electrostatic interactions and were performed  
695 at 310K temperature under NVT ensemble. In addition, 4fs time-step was used, with hydrogen  
696 mass repartitioning and with “friction” parameter set to 1.0/picosecond. Additional parameters



697 for these runs included: “EwaldErrorTolerance” 0.0005, “rigidwater” True, and  
698 “ConstraintTolerance” 0.000001. The van der Waals interactions were calculated applying a  
699 cutoff distance of 12 Å and switching the potential from 10 Å.

700

701 **MD simulations of SARS-CoV FP interactions with lipid membranes.** Interactions of selected  
702 two models of the Ca<sup>2+</sup>-bound WT SARS-CoV FP with lipid membranes were investigated with  
703 atomistic MD simulations. These runs were initiated by placing each of the models in the  
704 proximity of a bilayer composed of 3:1:1 POPC/POPG/Cholesterol that had been pre-equilibrated  
705 for 25ns as described previously [23].

706 After the FP-membrane complexes were embedded in a solution box (containing 150 mM  
707 Na<sup>+</sup>Cl<sup>-</sup> salt concentration), each system was equilibrated with NAMD version 2.13 following the  
708 same multi-step protocol described above during which the backbone atoms of the FP as well as  
709 the Ca<sup>2+</sup> ions were first harmonically constrained and subsequently gradually released in four  
710 steps. After this phase, the velocities of all atoms of the system were reset, and ensemble MD  
711 runs were initiated with OpenMM version 7.4. Each system was simulated in 18 independent  
712 replicates, each ran for ~ 1 μs (i.e., cumulative time of ~18 μs for each FP-membrane complex).  
713 These runs implemented PME for electrostatic interactions and were performed at 298K  
714 temperature under NPT ensemble using semi-isotropic pressure coupling, with 4fs time-steps,  
715 using hydrogen mass repartitioning and with “friction” parameter set to 1.0/picosecond.  
716 Additional parameters for these runs included: “EwaldErrorTolerance” 0.0005, “rigidwater” True,  
717 and “ConstraintTolerance” 0.000001. The van der Waals interactions were calculated applying a  
718 cutoff distance of 12 Å and switching the potential from 10 Å.

719 For all simulations we used the latest CHARMM36 force-field for proteins and lipids [48], as well  
720 as the recently revised CHARMM36 force-field for ions which includes non-bonded fix (NBFIX)  
721 parameters for Na<sup>+</sup> and Ca<sup>2+</sup> ions [49].

722

## 723 **Acknowledgements**

724 This work was supported by The National Institute of Health research grant R01AI35270, National  
725 Science Foundation RAPID grant 2027070 and Fast Grant from the Mercatus Center at George  
726 Mason University. TT is supported by the National Science Foundation Graduate Research  
727 Fellowship Program under Grant No. DGE-1650441 and the Samuel C. Fleming Family Graduate  
728 Fellowship. We would like to thank members of the Daniel, Whittaker, and Abbott groups as well  
729 as the Weinstein group at Weill Cornell for helpful discussions.

730

## 731 **Author Contributions**

732 Conceived and designed the experiments: MKB GK MRS HW GRW SD. Performed the  
733 experiments: MKB GK MRS TT JDC. Analyzed the data: MKB GK MRS TT HW GRW SD JDC. Wrote  
734 and edited the paper: MKB GK MRS TT HW GRW SD JDC. Acquired funding: GRW SD.

735

736

737 **Figure 1. Generating the charge-to-alanine mutations in the SARS-CoV fusion peptide.** (A) The  
738 predicted structure of the SARS-CoV fusion peptide (FP) modeled on the SARS PDB: 5XLR. (B) The  
739 sequence of the wild-type (WT) SARS FP showing all 40 amino acids (GenBank accession no.  
740 AAT74874.1) Listed below are the single charge-to-alanine mutations generated in the aspartic  
741 (D) and glutamic (E) acids. The red charged WT residues and the green substitution are shown in  
742 each position for the single mutants. Gold highlights a critical disulfide bond within the FP that is  
743 necessary for its function. (C) Alignment of the amino acid sequences of SARS-CoV, MERS-CoV,  
744 and SARS-CoV-2 FPs showing the high conservation of the LLF motif (green), the charges residues  
745 (red) and the disulfide bond. Note that the green LLF residues were not mutated in this study.

746  
747 **Figure 2. Cleavage comparison of SARS-CoV wild-type and mutant spike.** Western blot analysis  
748 of WT and mutant S proteins with (+) and without (-) trypsin. S<sub>0</sub> indicates the full-length,  
749 uncleaved spike protein. S<sub>2</sub> indicates the cleaved S2 subunit of the spike protein. (A) Spike  
750 immunoblots showing the accumulation of WT S and single charge-to-alanine mutants. (B) Spike  
751 immunoblots showing the additional mutants generated at the E801 position. N = 4 (biological  
752 replicates).

753  
754 **Figure 3. Fusion activity of the SARS-CoV wild-type and mutant S-expressing cells.** (A)  
755 Representative immunofluorescence images of VeroE6 cells expressing WT or mutant D802A S  
756 constructs. Following transfection, cells were treated with trypsin to cleave SARS-CoV S proteins  
757 and induce syncytium formation. Syncytia were visualized using a SARS-CoV S antibody (*green*)  
758 and nuclei appear in blue (DAPI). Images were taken at 10X magnification. Scale bars =170μM (B)  
759 Quantification of nuclei per syncytium. \*\*\* denotes significance of p < 0.001; \*\*\*\* denotes  
760 significance of p < 0.0001.

761  
762 **Figure 4. Infectivity of wild-type and mutant SARS-CoV pseudoparticles.** (A) Spike immunoblots  
763 of pseudoparticles containing wild-type and mutant spike. S<sub>0</sub> indicates the full-length, uncleaved  
764 spike protein. S<sub>2</sub> indicates the cleaved S2 subunit of the spike protein. (B) WT and mutant SARS-  
765 CoV pseudoparticle infectivity in VeroE6 cells treated with 50 μM EGTA (+) or left untreated (-).  
766 (C) WT and mutant SARS-CoV pseudoparticle infectivity in VeroE6 cells treated with 50 μM  
767 BAPTA-AM (+) or left untreated (-). \* denotes significance of p < 0.05; \*\* denotes significance of  
768 p < 0.01; \*\*\* denotes significance of p < 0.001; \*\*\*\* denotes significance of p < 0.0001.

769  
770 **Figure 5. Assessing the potential redundancy in fusion peptide and calcium interactions** (A)  
771 Double and triple mutants were generated in the FP to determine if residues E821 and D825 are  
772 functionally redundant. Multiple charged residues (red) in the SARS FP were mutated to alanines  
773 (green) to generate double and triple mutants. Gold highlights a critical disulfide bond within the  
774 FP that is necessary for its function. (B) Western blot analysis of WT and double/ triple mutant S  
775 proteins with (+) and without (-) trypsin. S<sub>0</sub> indicates the full-length, uncleaved spike protein. S<sub>2</sub>  
776 indicates the cleaved S2 subunit of the spike protein.

777  
778 (C) Representative immunofluorescence images of VeroE6 cells expressing WT or the triple  
779 mutant (E821A/D825A/D830A) S constructs. Following transfection, cells were treated with

780 trypsin to cleave SARS-CoV S proteins and induce syncytium formation. Syncytia were visualized  
781 using a SARS-CoV S antibody (*green*) and nuclei appear in blue (DAPI). Images were taken at 10X  
782 magnification. Scale bars =170 $\mu$ M (D) Quantification of nuclei per syncytium in the WT and  
783 double/triple mutant expressing VeroE6 cells. (E) Spike immunoblots of pseudoparticles  
784 containing wild-type and double/triple mutant spike.  $S_0$  indicates the full-length, uncleaved spike  
785 protein.  $S_2$  indicates the cleaved S2 subunit of the spike protein. (F) WT and double/triple mutant  
786 SARS-CoV pseudoparticle infectivity in VeroE6 cells treated with 50  $\mu$ M EGTA (+) or left untreated  
787 (-). (G) WT and double/triple mutant SARS-CoV pseudoparticle infectivity in VeroE6 cells treated  
788 with 50  $\mu$ M BAPTA-AM (+) or left untreated (-). \* denotes significance of  $p < 0.05$ ; \*\*\* denotes  
789 significance of  $p < 0.001$ ; \*\*\*\* denotes significance of  $p < 0.0001$ .

790  
791 **Figure 6. Modes of  $Ca^{2+}$  binding to SARS-CoV fusion peptide.** Number of  $Ca^{2+}$  binding events to  
792 different pairs of anionic residues in SARS-CoV FP in the simulations of the WT and the mutant  
793 constructs (labeled in each panel). The experimentally measured phenotypes for each construct  
794 are shown (active or inactive). The mode of  $Ca^{2+}$  ion association predicted to be inhibitory for  
795 membrane insertion (E821-D825) is shown in *red*, and the modes of  $Ca^{2+}$  association predicted  
796 to facilitate membrane insertion are depicted in *green*.

797  
798 **Figure 7. Membrane insertion for FP1 and FP2 domains of SARS-CoV fusion peptide.** (A-B)  
799 Frequency of membrane insertion for each residue of SARS-CoV FP in the MD simulations of  
800 Model 1 (A) and Model 2 (B) constructs (differing in the mode of  $Ca^{2+}$  coordination, see text). The  
801 snapshot insertions in the panels show the corresponding structures.  $Ca^{2+}$  coordinating anionic  
802 residues are highlighted by licorice rendering;  $Ca^{2+}$  ions are shown as blue spheres. The FP1 and  
803 FP2 parts of the fusion peptide are colored in silver and lime, respectively. (C-D) The same  
804 frequency calculations but done separately for two representative trajectories in Model 1 set in  
805 which the observed membrane insertions involved the N-terminal LLF motif (C) and the more  
806 centrally located (F815-M816) hydrophobic segment (D). The corresponding snapshots illustrate  
807 structural features of these two distinct insertion modes highlighting (in licorice) positions of the  
808 anionic residues, the hydrophobic residues penetrating the membrane, and R829 residue  
809 interacting with D825. Same color code as in panels A-B.

810  
811 **Figure 8. Predicted model of CoV FP interaction with a lipid bilayer.** This model is based on the  
812 pre-fusion FP domain (from PDB: 5XLR), and summarizes the data obtained from our work,  
813 highlighting the role of key charged residues within the fusion peptide. We depict the insertion  
814 of the FP1 domain with E801/D802- $Ca^{2+}$  (green) needed for membrane association and with D812  
815 able to coordinate  $Ca^{2+}$  and pair with either E821 to promote membrane interaction (green) or  
816 with D825 to inhibit membrane interaction (red).

817  
818  
819  
820

## 821 References

- 822 1. Lai MMC, Cavanagh D. *The Molecular Biology of Coronaviruses*. Elsevier; 1997. p. 1-100.
- 823 2. Masters PS. *The Molecular Biology of Coronaviruses*. *Advances in Virus Research* 2006. p. 193-  
824 292.
- 825 3. Cherry JD, Krogstad P. SARS: the first pandemic of the 21st century. *Pediatr Res*. 2004;56(1):1-  
826 5. Epub 2004/05/21. doi: 10.1203/01.PDR.0000129184.87042.FC. PubMed PMID: 15152053;  
827 PubMed Central PMCID: PMCPMC7086556.
- 828 4. de Groot RJ, Baker SC, Baric RS, Brown CS, Drosten C, Enjuanes L, et al. Middle East respiratory  
829 syndrome coronavirus (MERS-CoV): announcement of the Coronavirus Study Group. *J Virol*.  
830 2013;87(14):7790-2. Epub 2013/05/17. doi: 10.1128/JVI.01244-13. PubMed PMID:  
831 23678167; PubMed Central PMCID: PMCPMC3700179.
- 832 5. Wu F, Zhao S, Yu B, Chen YM, Wang W, Song ZG, et al. A new coronavirus associated with  
833 human respiratory disease in China. *Nature*. 2020;579(7798):265-9. Epub 2020/02/06. doi:  
834 10.1038/s41586-020-2008-3. PubMed PMID: 32015508; PubMed Central PMCID:  
835 PMCPMC7094943.
- 836 6. Zhou P, Yang XL, Wang XG, Hu B, Zhang L, Zhang W, et al. A pneumonia outbreak associated  
837 with a new coronavirus of probable bat origin. *Nature*. 2020;579(7798):270-3. Epub  
838 2020/02/06. doi: 10.1038/s41586-020-2012-7. PubMed PMID: 32015507; PubMed Central  
839 PMCID: PMCPMC7095418.
- 840 7. M SM, P M, F A-S, C R, MP K, B M. World Health Organization methodology to prioritize  
841 emerging infectious diseases in need of research and development. *Emerg Infect Dis*. 2018.  
842 doi: 10.3201/eid2409.171427.
- 843 8. da Costa VG, Moreli ML, Saivish MV. The emergence of SARS, MERS and novel SARS-2  
844 coronaviruses in the 21st century. *Arch Virol*. 2020;165(7):1517-26. Epub 2020/04/22. doi:  
845 10.1007/s00705-020-04628-0. PubMed PMID: 32322993.
- 846 9. Velavan TP, Meyer CG. The COVID-19 epidemic. *Trop Med Int Health*. 2020;25(3):278-80.  
847 Epub 2020/02/16. doi: 10.1111/tmi.13383. PubMed PMID: 32052514.
- 848 10. Tang T, Bidon M, Jaimes JA, Whittaker GR, Daniel S. Coronavirus membrane fusion  
849 mechanism offers a potential target for antiviral development. *Antiviral Res*.  
850 2020;178:104792. Epub 2020/04/10. doi: 10.1016/j.antiviral.2020.104792. PubMed PMID:  
851 32272173; PubMed Central PMCID: PMCPMC7194977.
- 852 11. de Wit E, van Doremalen N, Falzarano D, Munster VJ. SARS and MERS: recent insights into  
853 emerging coronaviruses. *Nat Rev Microbiol*. 2016;14(8):523-34. Epub 2016/06/28. doi:  
854 10.1038/nrmicro.2016.81. PubMed PMID: 27344959.
- 855 12. Belouzard S, Millet JK, Licitra BN, Whittaker GR. Mechanisms of coronavirus cell entry  
856 mediated by the viral spike protein. *Viruses*. 2012;4(6):1011-33. Epub 2012/07/21. doi:  
857 10.3390/v4061011. PubMed PMID: 22816037; PubMed Central PMCID: PMCPMC3397359.
- 858 13. Millet JK, Whittaker GR. Physiological and molecular triggers for SARS-CoV membrane fusion  
859 and entry into host cells. *Virology*. 2018;517:3-8. Epub 2017/12/26. doi:  
860 10.1016/j.virol.2017.12.015. PubMed PMID: 29275820.
- 861 14. Lee C-Y, Lowen AC. Animal models for SARS-CoV-2. *Current Opinion in Virology*. 2021;48:73-  
862 81. doi: 10.1016/j.coviro.2021.03.009.

- 863 15. Millet JK, Whittaker GR. Host cell proteases: Critical determinants of coronavirus tropism and  
864 pathogenesis. *Virus Res.* 2015;202:120-34. Epub 2014/12/03. doi:  
865 10.1016/j.virusres.2014.11.021. PubMed PMID: 25445340; PubMed Central PMCID:  
866 PMCPMC4465284.
- 867 16. Stevens CS, Oguntuyo KY, Benhur L. Proteases and variants: context matters for SARS-CoV-2  
868 entry assays. *Current Opinion in Virology.* 2021. doi: 10.1016/j.coviro.2021.07.004.
- 869 17. White JM, Whittaker GR. Fusion of Enveloped Viruses in Endosomes. *Traffic.* 2016;17(6):593-  
870 614. Epub 2016/03/05. doi: 10.1111/tra.12389. PubMed PMID: 26935856; PubMed Central  
871 PMCID: PMCPMC4866878.
- 872 18. Madu IG, Roth SL, Belouzard S, Whittaker GR. Characterization of a highly conserved domain  
873 within the severe acute respiratory syndrome coronavirus spike protein S2 domain with  
874 characteristics of a viral fusion peptide. *J Virol.* 2009;83(15):7411-21. Epub 2009/05/15. doi:  
875 10.1128/JVI.00079-09. PubMed PMID: 19439480; PubMed Central PMCID:  
876 PMCPMC2708636.
- 877 19. Lai AL, Millet JK, Daniel S, Freed JH, Whittaker GR. The SARS-CoV Fusion Peptide Forms an  
878 Extended Bipartite Fusion Platform that Perturbs Membrane Order in a Calcium-Dependent  
879 Manner. *J Mol Biol.* 2017;429(24):3875-92. Epub 2017/10/24. doi:  
880 10.1016/j.jmb.2017.10.017. PubMed PMID: 29056462; PubMed Central PMCID:  
881 PMCPMC5705393.
- 882 20. Straus MR, Tang T, Lai AL, Flegel A, Bidon M, Freed JH, et al. Ca(2+) Ions Promote Fusion of  
883 Middle East Respiratory Syndrome Coronavirus with Host Cells and Increase Infectivity. *J*  
884 *Virol.* 2020;94(13). Epub 2020/04/17. doi: 10.1128/JVI.00426-20. PubMed PMID: 32295925;  
885 PubMed Central PMCID: PMCPMC7307142.
- 886 21. Nathan L, Lai AL, Millet JK, Straus MR, Freed JH, Whittaker GR, et al. Calcium Ions Directly  
887 Interact with the Ebola Virus Fusion Peptide To Promote Structure-Function Changes That  
888 Enhance Infection. *ACS Infect Dis.* 2020;6(2):250-60. Epub 2019/11/21. doi:  
889 10.1021/acsinfecdis.9b00296. PubMed PMID: 31746195; PubMed Central PMCID:  
890 PMCPMC7040957.
- 891 22. Lai AL, Freed JH. SARS-CoV-2 Fusion Peptide has a Greater Membrane Perturbating Effect  
892 than SARS-CoV with Highly Specific Dependence on Ca<sup>2+</sup>. *Journal of Molecular Biology.*  
893 2021;433(10):166946.
- 894 23. Khelashvili G, Plante A, Doktorova M, Weinstein H. Ca<sup>2+</sup>-dependent mechanism  
895 of membrane insertion and destabilization by the SARS-CoV-2 fusion peptide. *Biophysical*  
896 *Journal.* 2021;120(6):1105-19. doi: 10.1016/j.bpj.2021.02.023.
- 897 24. Basso LG, Vicente EF, Crusca E, Jr., Cilli EM, Costa-Filho AJ. SARS-CoV fusion peptides induce  
898 membrane surface ordering and curvature. *Sci Rep.* 2016;6:37131. Epub 2016/11/29. doi:  
899 10.1038/srep37131. PubMed PMID: 27892522; PubMed Central PMCID: PMCPMC5125003.
- 900 25. Koppiseti RK, Fulcher YG, Van Doren SR. Fusion Peptide of SARS-CoV-2 Spike Rearranges into  
901 a Wedge Inserted in Bilayered Micelles. *Journal of the American Chemical Society.* 2021. doi:  
902 10.1021/jacs.1c05435.
- 903 26. Wang H, Yang P, Liu K, Guo F, Zhang Y, Zhang G, et al. SARS coronavirus entry into host cells  
904 through a novel clathrin- and caveolae-independent endocytic pathway. *Cell Res.*  
905 2008;18(2):290-301. Epub 2008/01/30. doi: 10.1038/cr.2008.15. PubMed PMID: 18227861;  
906 PubMed Central PMCID: PMCPMC7091891.

- 907 27. Millet JK, Tang T, Nathan L, Jaimes JA, Hsu HL, Daniel S, et al. Production of Pseudotyped  
908 Particles to Study Highly Pathogenic Coronaviruses in a Biosafety Level 2 Setting. *J Vis Exp.*  
909 2019;(145). Epub 2019/03/19. doi: 10.3791/59010. PubMed PMID: 30882796.
- 910 28. Tang T, Jaimes JA, Bidon MK, Straus MR, Daniel S, Whittaker GR. Proteolytic Activation of  
911 SARS-CoV-2 Spike at the S1/S2 Boundary: Potential Role of Proteases beyond Furin. *ACS Infect*  
912 *Dis.* 2021;7(2):264-72. Epub 2021/01/13. doi: 10.1021/acsinfecdis.0c00701. PubMed PMID:  
913 33432808; PubMed Central PMCID: PMC7839419.
- 914 29. Madu IG, Belouzard S, Whittaker GR. SARS-coronavirus spike S2 domain flanked by cysteine  
915 residues C822 and C833 is important for activation of membrane fusion. *Virology.*  
916 2009;393(2):265-71. Epub 2009/09/01. doi: 10.1016/j.virol.2009.07.038. PubMed PMID:  
917 19717178; PubMed Central PMCID: PMC3594805.
- 918 30. Du L, He Y, Zhou Y, Liu S, Zheng BJ, Jiang S. The spike protein of SARS-CoV--a target for vaccine  
919 and therapeutic development. *Nat Rev Microbiol.* 2009;7(3):226-36. Epub 2009/02/10. doi:  
920 10.1038/nrmicro2090. PubMed PMID: 19198616; PubMed Central PMCID:  
921 PMC2750777.
- 922 31. Lu G, Wang Q, Gao GF. Bat-to-human: spike features determining 'host jump' of  
923 coronaviruses SARS-CoV, MERS-CoV, and beyond. *Trends Microbiol.* 2015;23(8):468-78. Epub  
924 2015/07/25. doi: 10.1016/j.tim.2015.06.003. PubMed PMID: 26206723.
- 925 32. Dubé M, Rey FA, Kielian M. Rubella Virus: First Calcium-Requiring Viral Fusion Protein. *PLOS*  
926 *Pathogens.* 2014;10(12):e1004530. doi: 10.1371/journal.ppat.1004530.
- 927 33. Schaefer SL, Jung H, Hummer G. Binding of SARS-CoV-2 Fusion Peptide to Host tmpr and  
928 Plasma Membrane. *The Journal of Physical Chemistry B.* 2021;125(28):7732-41. doi:  
929 10.1021/acs.jpcc.1c04176.
- 930 34. Cai Y, Zhang J, Xiao T, Peng H, Sterling SM, Walsh RM, et al. Distinct conformational states of  
931 SARS-CoV-2 spike protein. *Science.* 2020;369(6511):1586. doi: 10.1126/science.abd4251.
- 932 35. Straus MR, Bidon M, Tang T, Whittaker GR, Daniel S. FDA approved calcium channel blockers  
933 inhibit SARS-CoV-2 infectivity in epithelial lung cells. *bioRxiv.* 2020:2020.07.21.214577. doi:  
934 10.1101/2020.07.21.214577.
- 935 36. Crespi B, Alcock J. Conflicts over calcium and the treatment of COVID-19. *Evolution, Medicine,*  
936 *and Public Health.* 2021;9(1):149-56. doi: 10.1093/emph/eoaa046.
- 937 37. Danta CC. Calcium Channel Blockers: A Possible Potential Therapeutic Strategy for the  
938 Treatment of Alzheimer's Dementia Patients with SARS-CoV-2 Infection. *ACS Chem Neurosci.*  
939 2020;11(15):2145-8. Epub 2020/07/15. doi: 10.1021/acschemneuro.0c00391. PubMed  
940 PMID: 32662982.
- 941 38. Borges V, Isidro J, Cortes-Martins H, Duarte S, Vieira L, Leite R, et al. Massive dissemination  
942 of a SARS-CoV-2 Spike Y839 variant in Portugal. *Emerging Microbes & Infections.*  
943 2020;9(1):2488-96. doi: 10.1080/22221751.2020.1844552.
- 944 39. Korber B, Fischer WM, Gnanakaran S, Yoon H, Theiler J, Abfalterer W, et al. Tracking Changes  
945 in SARS-CoV-2 Spike: Evidence that D614G Increases Infectivity of the COVID-19 Virus. *Cell.*  
946 2020;182(4):812-27.e19.
- 947 40. Li Q, Wu J, Nie J, Zhang L, Hao H, Liu S, et al. The Impact of Mutations in SARS-CoV-2 Spike on  
948 Viral Infectivity and Antigenicity. *Cell.* 2020;182(5):1284-94.e9.

- 949 41. Belouzard S, Chu VC, Whittaker GR. Activation of the SARS coronavirus spike protein via  
950 sequential proteolytic cleavage at two distinct sites. *Proceedings of the National Academy of*  
951 *Sciences*. 2009;106(14):5871. doi: 10.1073/pnas.0809524106.
- 952 42. Olsson MHM, Søndergaard CR, Rostkowski M, Jensen JH. PROPKA3: Consistent Treatment of  
953 Internal and Surface Residues in Empirical pKa Predictions. *Journal of Chemical Theory and*  
954 *Computation*. 2011;7(2):525-37. doi: 10.1021/ct100578z.
- 955 43. Humphrey W, Dalke A, Schulten K. VMD: Visual molecular dynamics. *Journal of Molecular*  
956 *Graphics*. 1996;14(1):33-8.
- 957 44. Phillips JC, Braun R, Wang W, Gumbart J, Tajkhorshid E, Villa E, et al. Scalable molecular  
958 dynamics with NAMD. *Journal of Computational Chemistry*. 2005;26(16):1781-802.
- 959 45. Essmann U, Perera L, Berkowitz ML, Darden T, Lee H, Pedersen LG. A smooth particle mesh  
960 Ewald method. *The Journal of Chemical Physics*. 1995;103(19):8577-93. doi:  
961 10.1063/1.470117.
- 962 46. Evans DJ, Holian BL. The Nose–Hoover thermostat. *The Journal of Chemical Physics*.  
963 1985;83(8):4069-74. doi: 10.1063/1.449071.
- 964 47. Eastman P, Swails J, Chodera JD, McGibbon RT, Zhao Y, Beauchamp KA, et al. OpenMM 7:  
965 Rapid development of high performance algorithms for molecular dynamics. *PLOS*  
966 *Computational Biology*. 2017;13(7):e1005659. doi: 10.1371/journal.pcbi.1005659.
- 967 48. Huang J, Rauscher S, Nawrocki G, Ran T, Feig M, de Groot BL, et al. CHARMM36m: an  
968 improved force field for folded and intrinsically disordered proteins. *Nature Methods*.  
969 2017;14(1):71-3. doi: 10.1038/nmeth.4067.
- 970 49. Venable RM, Luo Y, Gawrisch K, Roux B, Pastor RW. Simulations of Anionic Lipid Membranes:  
971 Development of Interaction-Specific Ion Parameters and Validation Using NMR Data. *The*  
972 *Journal of Physical Chemistry B*. 2013;117(35):10183-92. doi: 10.1021/jp401512z.
- 973

974 **Figures**



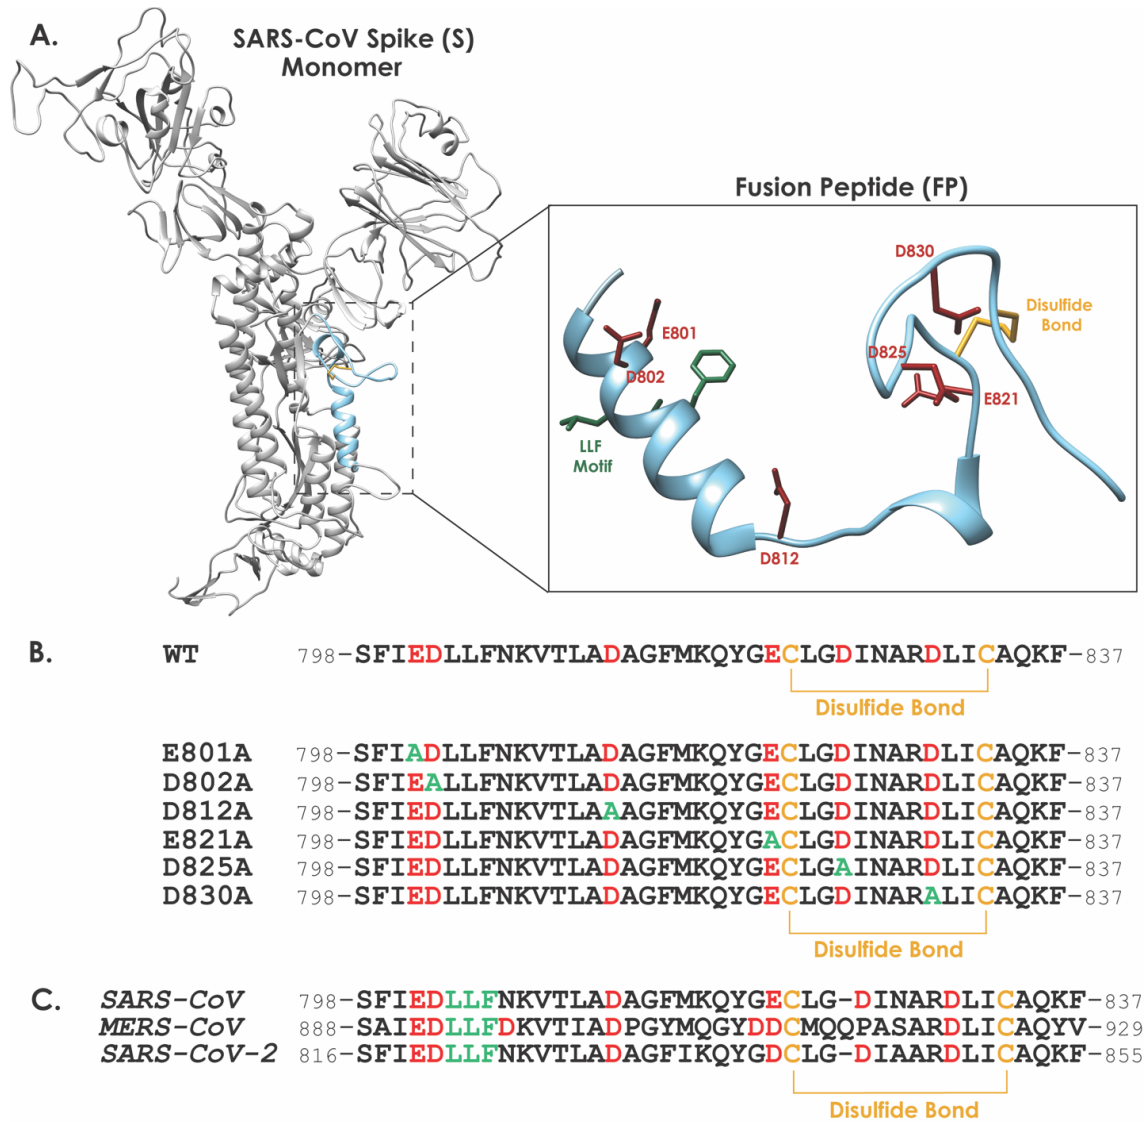

975

976 **Figure 1.**

977

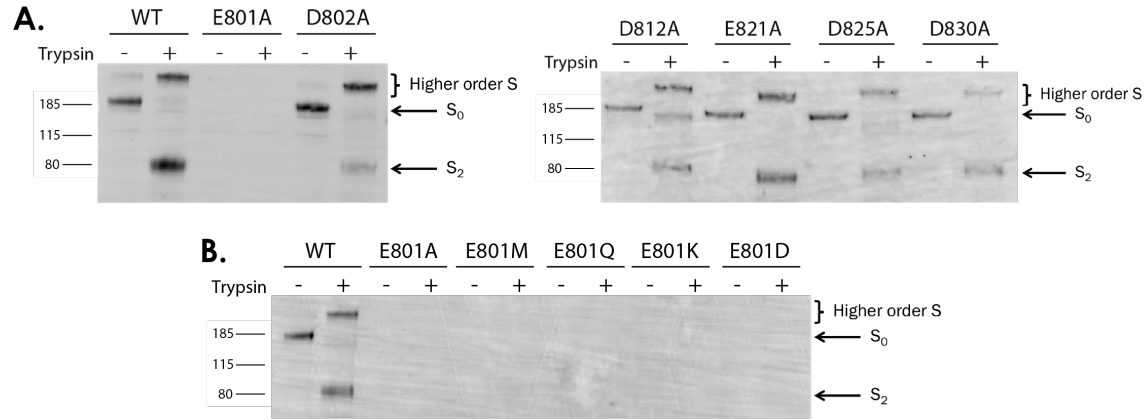

978

979

980 **Figure 2.**

981

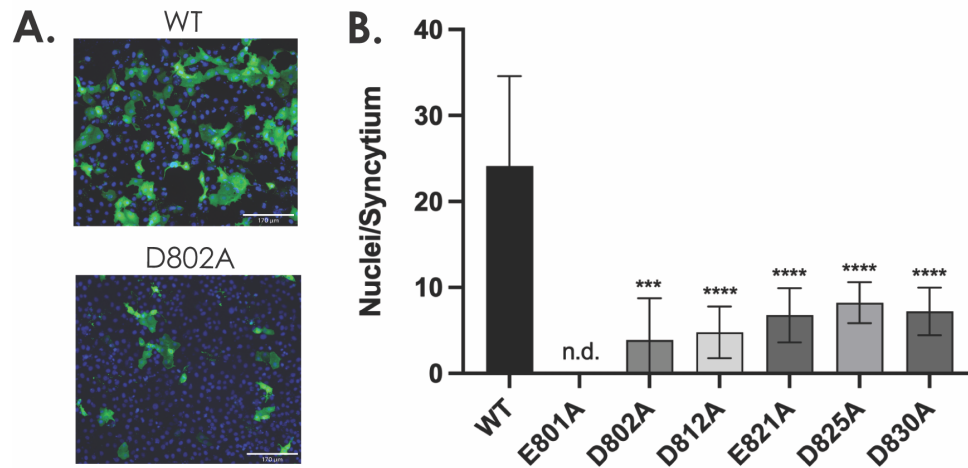

982

983 **Figure 3.**

984

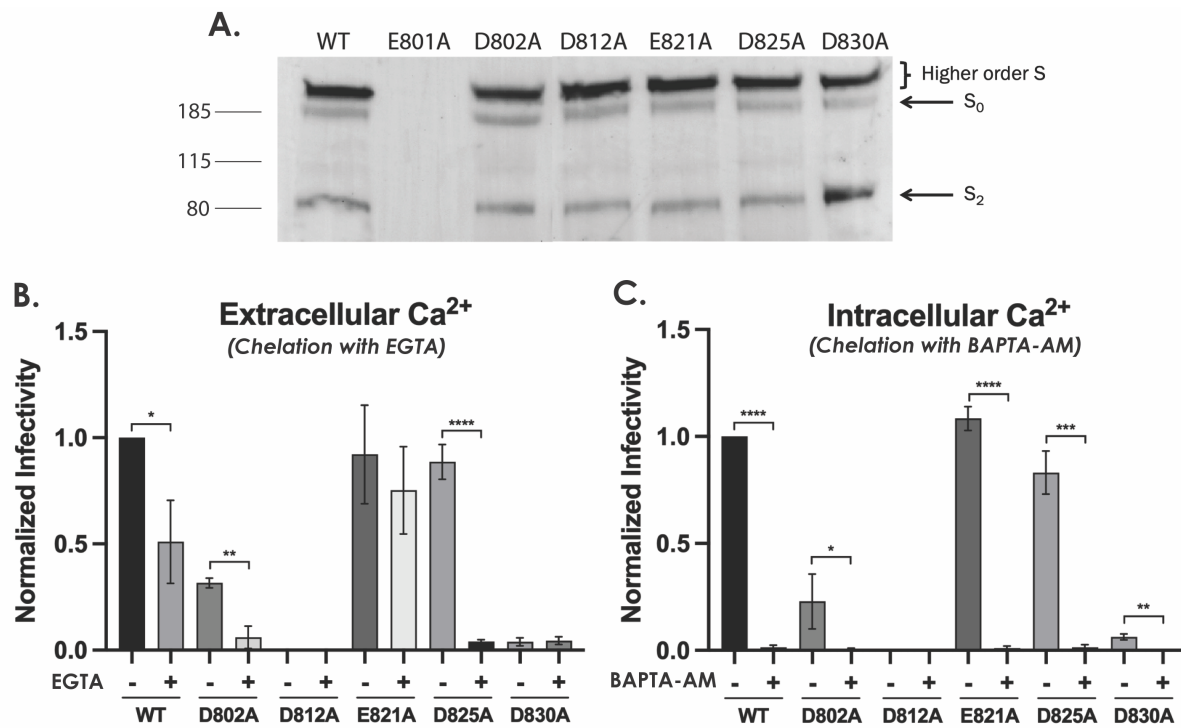

985

986 **Figure 4.**

987

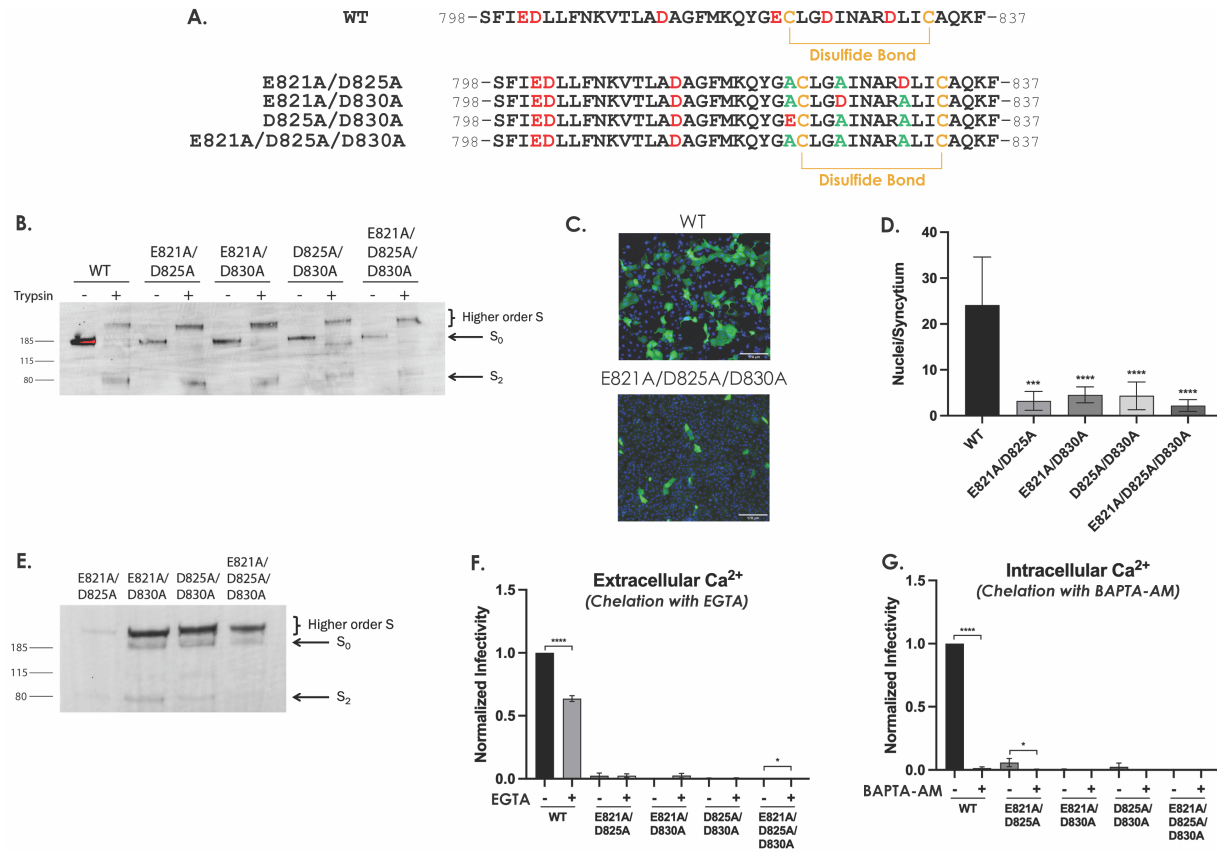

988

989 **Figure 5.**

990

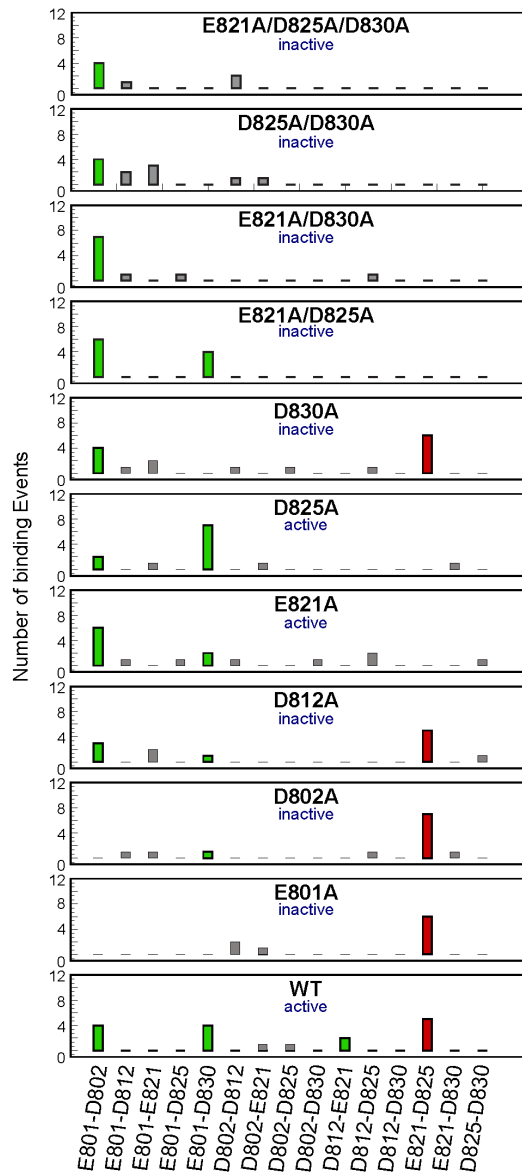

991

992 **Figure 6.**

993

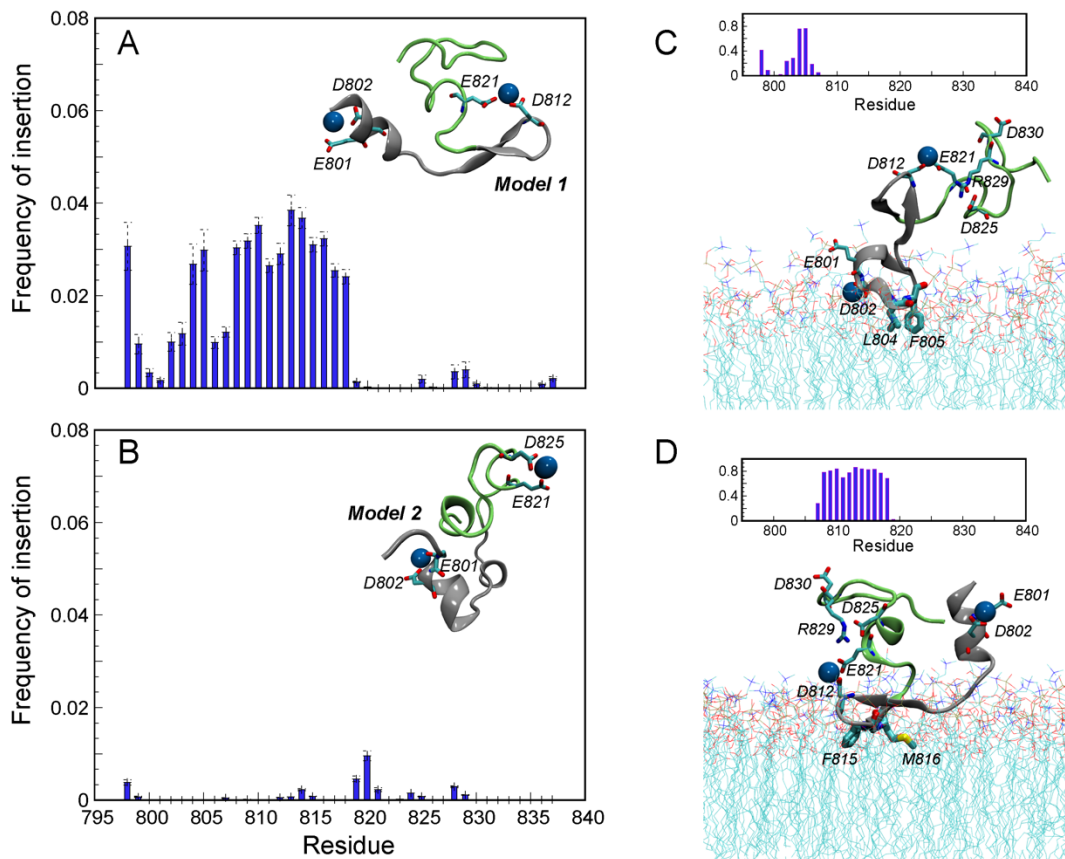

994

995 **Figure 7.**

996

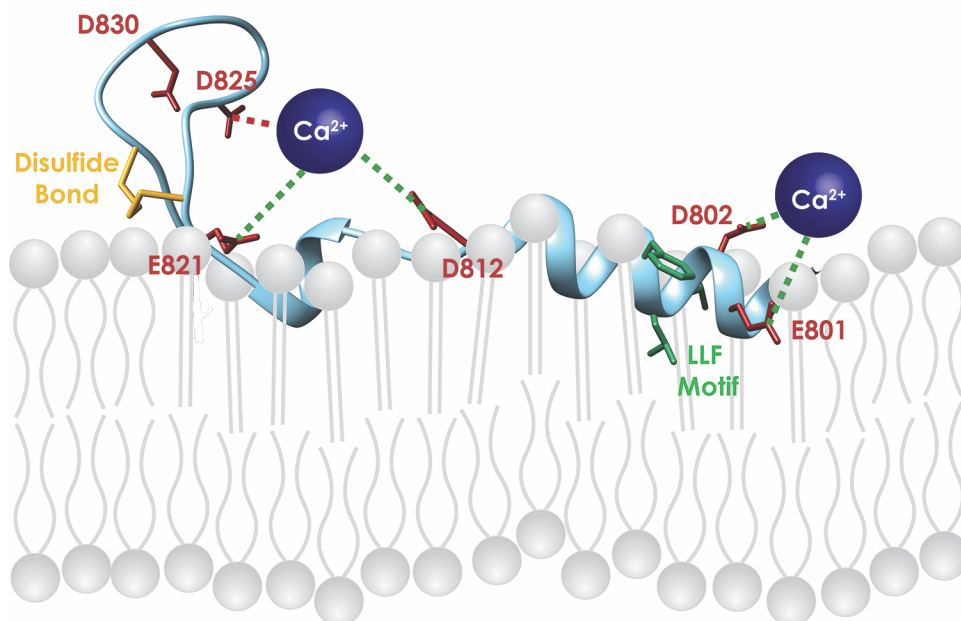

997

998 **Figure 8.**

999

1000 **Supplementary Information**

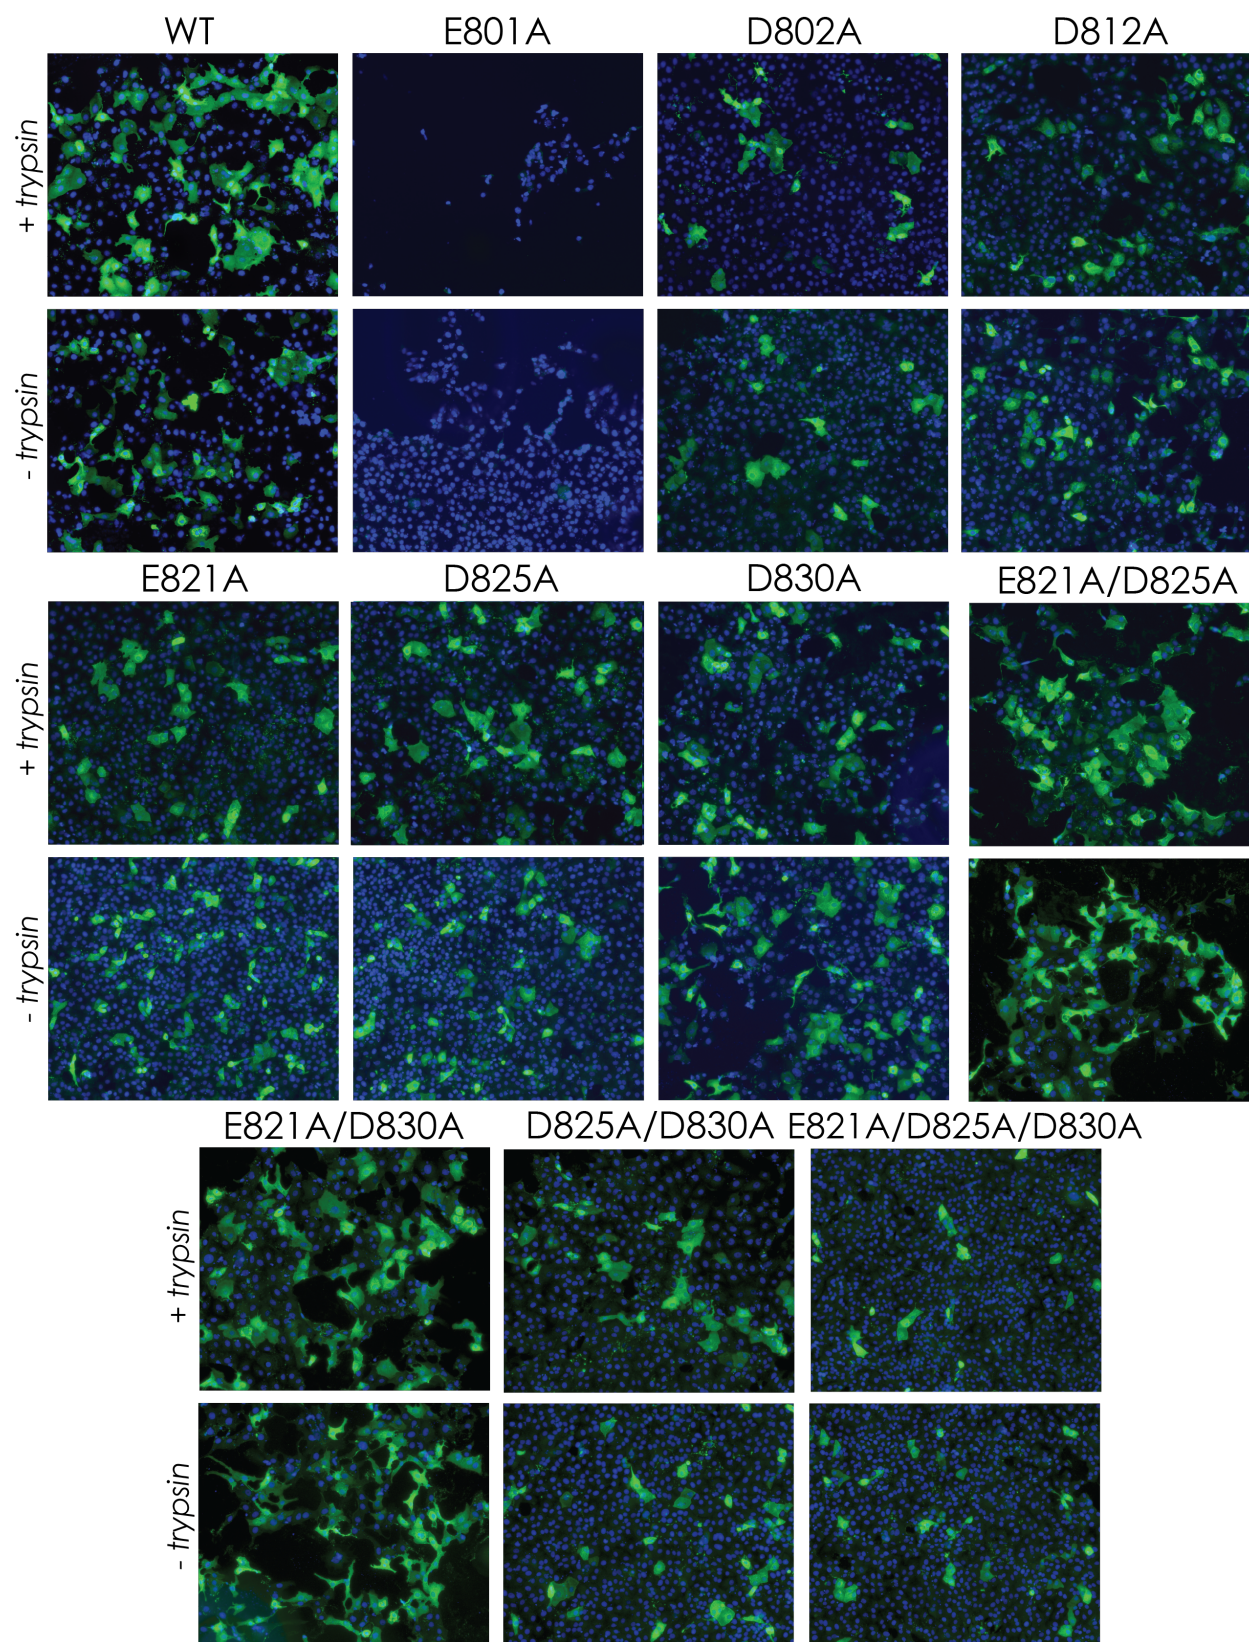

1001



1002 **SI Fig S1. Fusion activity of the SARS-CoV wild-type and mutant S-expressing cells.**  
 1003 Immunofluorescence images of VeroE6 cells expressing WT or mutant (single/double/triple) S  
 1004 constructs. Following transfection, cells were treated with trypsin to cleave SARS-CoV S proteins  
 1005 and induce syncytium formation. Syncytia were visualized using a SARS-CoV S antibody (*green*)  
 1006 and nuclei appear in blue (DAPI). Images were taken at 10X magnification.

1007

1008

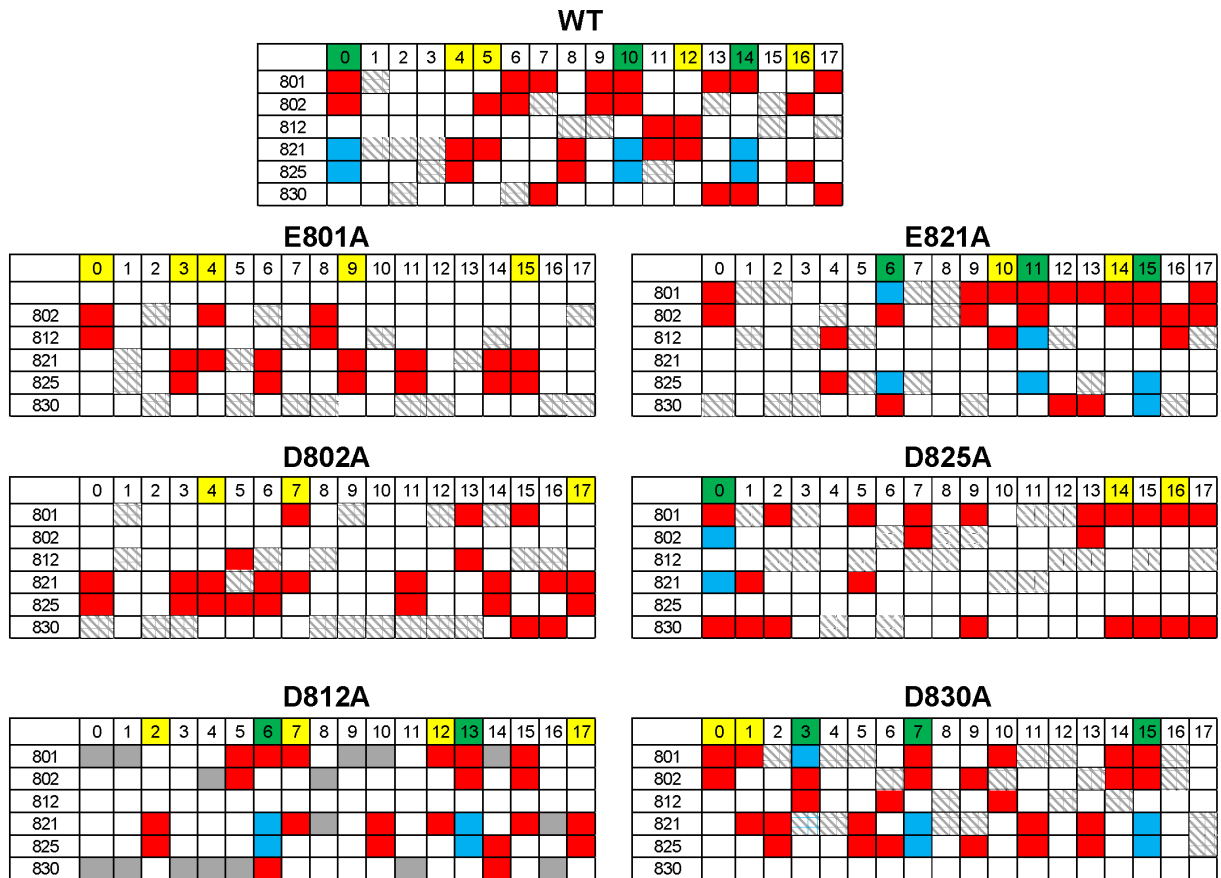

1009

1010 **SI Fig S2. Models of Ca<sup>2+</sup> binding to the WT and single mutant SARS-CoV FPs.** The tables show,  
 1011 for each construct, acidic residues implicated in Ca<sup>2+</sup> binding in 18 independent atomistic MD  
 1012 simulations (each 640ns in length). In a particular trajectory, residue pairs simultaneously  
 1013 engaging with the bound Ca<sup>2+</sup> are denoted by *red* or *blue* rectangles, whereas instances of Ca<sup>2+</sup>  
 1014 ion associating with a single acidic residue is depicted with *grey-striped* rectangle. The  
 1015 trajectories in which simultaneous binding of two Ca<sup>2+</sup> ions to different pairs of residues were  
 1016 observed are highlighted in *green*. The simulations in which a single Ca<sup>2+</sup> ion was bound to a pair  
 1017 of acidic residues are shown in *yellow*.

1018

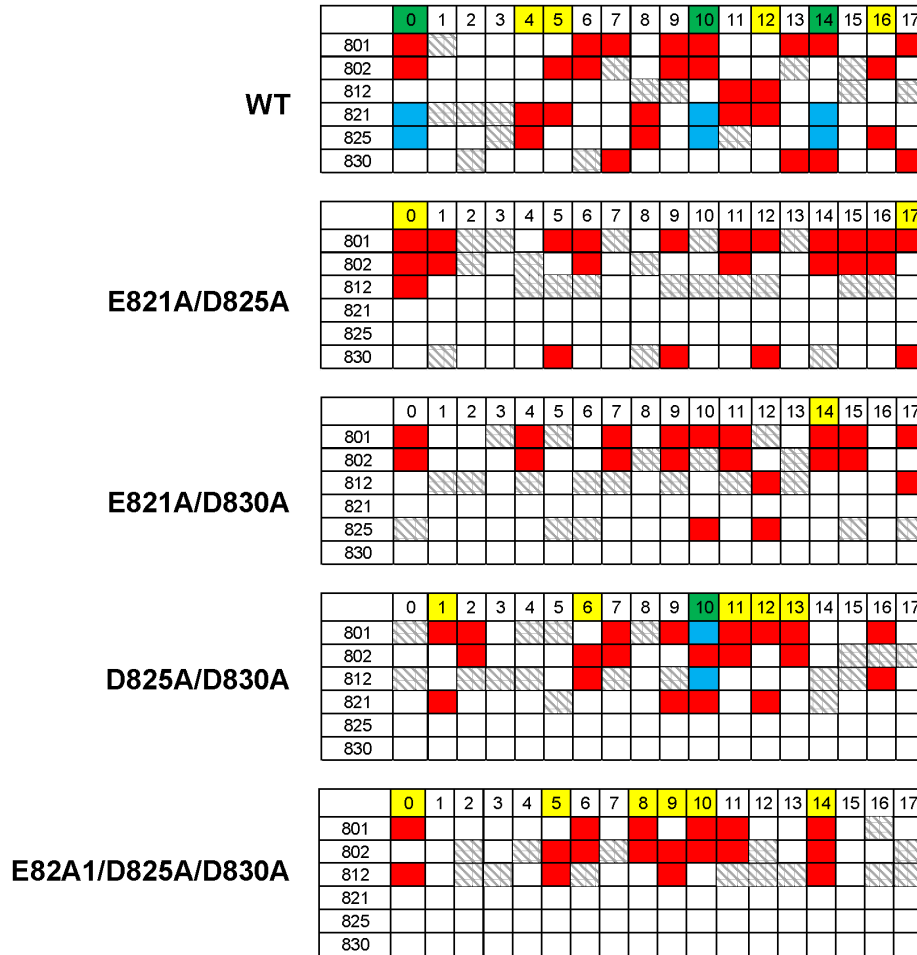

1019

1020 **SI Fig S3. Models of Ca<sup>2+</sup> binding to the WT and multiple mutant SARS-CoV FPs.** The tables show,  
 1021 for each construct, acidic residues implicated in Ca<sup>2+</sup> binding in 18 independent atomistic MD  
 1022 simulations (each 640ns in length). In a particular trajectory, residue pairs simultaneously  
 1023 engaging with the bound Ca<sup>2+</sup> are denoted by *red* or *blue* rectangles, whereas instances of Ca<sup>2+</sup>  
 1024 ion associating with a single acidic residue is depicted with *grey-striped* rectangle. The  
 1025 trajectories in which simultaneous binding of two Ca<sup>2+</sup> ions to different pairs of residues were  
 1026 observed are highlighted in *green*. The simulations in which a single Ca<sup>2+</sup> ion was bound to a pair  
 1027 of acidic residues are shown in *yellow*.  
 1028

| Mutation          | Forward Primer                       | Reverse Primer                       |
|-------------------|--------------------------------------|--------------------------------------|
| E801A             | GCGCAGCTTCATCGCGGACCTGCTCTTCA        | TGAAGAGCAGGTCCGCGATGAAGCTGCGC        |
| E801M             | TGTTGAAGAGCAGGTCCATGATGAAGCTGCGCTTGG | CCAAGCGCAGCTTCATCATGGACCTGCTCTTCAACA |
| E801Q             | GAAGAGCAGGTCTGGATGAAGCTGCGCT         | AGCGCAGCTTCATCCAGGACCTGCTCTTC        |
| E801K             | TTGAAGAGCAGGTCTTGATGAAGCTGCGCTTG     | CAAGCGCAGCTTCATCAAGGACCTGCTCTTCAA    |
| E801D             | GTTGAAGAGCAGGTCTGTCGATGAAGCTGCGC     | GCGCAGCTTCATCGACGACCTGCTCTTCAAC      |
| D802A             | CTTGTGAAGAGCAGGGCCTCGATGAAGCTGCG     | CGCAGCTTCATCGAGGCCCTGCTCTTCAACAAG    |
| D812A             | TGAAGCCGGCGGCGCCAGCGTC               | GACGCTGGCCGCCGCGCTTCA                |
| E821A             | CGCCAGGCACGCGCCGACTGC                | GCAGTACGGCGCGTGCCTGGGCG              |
| D825A             | CGGGCGTTGATGGCGCCAGGCACT             | AGTGCCTGGGCGCCATCAACGCCCG            |
| D830A             | GCGCAGATCAGGGCGCGGGCGTTGA            | TCAACGCCCGCGCCCTGATCTGCGC            |
| E821A/D825A       | CGGGCGTTGATGGCGCCAGGCACG             | CGTGCCTGGGCGCCATCAACGCCCG            |
| E821A/D830A       | GCGCAGATCAGGGCGCGGGCGTTGA            | TCAACGCCCGCGCCCTGATCTGCGC            |
| D825A/D830A       | GCGCAGATCAGGGCGCGGGCGTTGA            | TCAACGCCCGCGCCCTGATCTGCGC            |
| E821A/D825A/D830A | GCGCAGATCAGGGCGCGGGCGTTGA            | TCAACGCCCGCGCCCTGATCTGCGC            |

1029  
1030  
1031

**SI Table S1. List of primers used to generate SARS-CoV S mutants.**
